# Supplementary material for: Up-Regulated Expression of Extracellular Matrix Remodeling Genes in Phagocytically Challenged Trabecular Meshwork Cells
Source: PubMed Central journal article supplement (PMC3329506; doi:10.1371/journal.pone.0034792), 2012-04-18
Supplement: pone.0034792.s002.pdf [file pone.0034792.s002.pdf]

**SM-Table 1: Genes Significantly Upregulated (>2 fold, p<0.05) in HTM Cells Phagocytically Challenged to E. coli Under Physiological Conditions**

| Gene Title                                                                         | Gene Symbol | UniGene ID | Fold   | PValue  | Chromosomal Location |
|------------------------------------------------------------------------------------|-------------|------------|--------|---------|----------------------|
| chemokine (C-X-C motif) ligand 11                                                  | CXCL11      | Hs.632592  | 177.85 | 1.8E-03 | chr4q21.2            |
| interferon, alpha-inducible protein 27                                             | IFI27       | Hs.532634  | 75.68  | 2.1E-03 | chr14q32             |
| myxovirus (influenza virus) resistance 1, interferon-inducible protein p78 (mouse) | MX1         | Hs.517307  | 57.25  | 2.1E-03 | chr21q22.3           |
| chemokine (C-X-C motif) ligand 5                                                   | CXCL5       | Hs.89714   | 54.52  | 2.5E-03 | chr4q12-q13          |
| chemokine (C-C motif) ligand 20                                                    | CCL20       | Hs.75498   | 48.05  | 3.5E-03 | chr2q33-q37          |
| interferon-induced protein 44-like                                                 | IFI44L      | Hs.389724  | 47.48  | 1.8E-03 | chr1p31.1            |
| bone marrow stromal cell antigen 2                                                 | BST2        | Hs.118110  | 43.91  | 1.9E-03 | chr19p13.2           |
| chemokine (C-X-C motif) ligand 2                                                   | CXCL2       | Hs.75765   | 43.51  | 1.9E-03 | chr4q21              |
| chemokine (C-C motif) ligand 8                                                     | CCL8        | Hs.271387  | 39.29  | 3.4E-03 | chr17q11.2           |
| chemokine (C-X-C motif) ligand 3                                                   | CXCL3       | Hs.89690   | 37.79  | 2.7E-03 | chr4q21              |
| radical S-adenosyl methionine domain containing 2                                  | RSAD2       | Hs.17518   | 36.87  | 3.5E-03 | chr2p25.2            |
| 2',5'-oligoadenylate synthetase 1, 40/46kDa                                        | OAS1        | Hs.524760  | 34.84  | 4.1E-03 | chr12q24.1           |
| ISG15 ubiquitin-like modifier                                                      | ISG15       | Hs.458485  | 33.80  | 2.1E-03 | chr1p36.33           |
| 2'-5'-oligoadenylate synthetase 2, 69/71kDa                                        | OAS2        | Hs.414332  | 28.77  | 1.8E-03 | chr12q24.2           |
| hect domain and RLD 6                                                              | HERC6       | Hs.529317  | 25.85  | 2.3E-03 | chr4q22.1            |
| chemokine (C-C motif) ligand 7                                                     | CCL7        | Hs.251526  | 24.14  | 1.8E-03 | chr17q11.2-q12       |
| superoxide dismutase 2, mitochondrial                                              | SOD2        | Hs.487046  | 24.05  | 3.6E-03 | chr6q25.3            |
| interleukin 33                                                                     | IL33        | Hs.348390  | 22.50  | 2.2E-03 | chr9p24.1            |
| chemokine (C-X-C motif) ligand 10                                                  | CXCL10      | Hs.632586  | 21.74  | 2.1E-03 | chr4q21              |
| interleukin 8                                                                      | IL8         | Hs.624     | 20.68  | 5.8E-03 | chr4q13-q21          |
| cytidine monophosphate (UMP-CMP) kinase 2, mitochondrial                           | CMPK2       | Hs.7155    | 19.93  | 4.0E-03 | chr2p25.2            |
| Ets homologous factor                                                              | EHF         | Hs.653859  | 19.32  | 1.2E-03 | chr11p12             |
| interleukin 6 (interferon, beta 2)                                                 | IL6         | Hs.654458  | 18.83  | 2.7E-03 | chr7p21              |
| chromosome 15 open reading frame 48                                                | C15orf48    | Hs.112242  | 18.02  | 3.2E-03 | chr15q21.1           |
| chemokine (C-X-C motif) ligand 1 (melanoma growth stimulating activity, alpha)     | CXCL1       | Hs.789     | 16.33  | 3.9E-03 | chr4q21              |
| myxovirus (influenza virus) resistance 2 (mouse)                                   | MX2         | Hs.926     | 15.86  | 2.9E-03 | chr21q22.3           |
| complement component 2 /// complement factor B                                     | C2 /// CFB  | Hs.408903  | 15.74  | 2.1E-03 | chr6p21.3            |
| interferon-induced protein with tetratricopeptide repeats 1                        | IFIT1       | Hs.20315   | 14.39  | 2.7E-03 | chr10q25-q26         |
| interferon, alpha-inducible protein 6                                              | IFI6        | Hs.523847  | 14.31  | 2.1E-03 | chr1p35              |
| interferon-induced protein with tetratricopeptide repeats 3                        | IFIT3       | Hs.714337  | 14.04  | 2.1E-03 | chr10q24             |
| solute carrier family 39 (zinc transporter), member 8                              | SLC39A8     | Hs.288034  | 13.42  | 4.7E-03 | chr4q22-q24          |
| matrix metalloproteinase 12 (macrophage elastase)                                  | MMP12       | Hs.1695    | 13.16  | 2.3E-03 | chr11q22.3           |
| metallothionein 1M                                                                 | MT1M        | Hs.647370  | 13.08  | 6.0E-03 | chr16q13             |

**SM-Table 1: Genes Significantly Upregulated (>2 fold, p<0.05) in HTM Cells Phagocytically Challenged to E. coli Under Physiological Conditions**

| Gene Title                                                                         | Gene Symbol | UniGene ID | Fold  | PValue  | Chromosomal Location |
|------------------------------------------------------------------------------------|-------------|------------|-------|---------|----------------------|
| stanniocalcin 1                                                                    | STC1        | Hs.25590   | 12.64 | 1.9E-03 | chr8p21-p11.2        |
| interferon induced with helicase C domain 1                                        | IFIH1       | Hs.163173  | 12.29 | 2.1E-03 | chr2q24              |
| tumor necrosis factor, alpha-induced protein 3                                     | TNFAIP3     | Hs.211600  | 11.98 | 2.3E-03 | chr6q23              |
| 230746_s_at                                                                        |             | Hs.713064  | 11.70 | 1.8E-03 |                      |
| chemokine (C-C motif) ligand 2                                                     | CCL2        | Hs.303649  | 11.65 | 3.7E-03 | chr17q11.2-q12       |
| matrix metalloproteinase 3 (stromelysin 1, progelatinase)                          | MMP3        | Hs.375129  | 11.20 | 3.8E-03 | chr11q22.3           |
| hypothetical protein LOC387763                                                     | LOC387763   | Hs.714890  | 11.13 | 4.2E-03 | chr11p11.2           |
| hydroxysteroid (11-beta) dehydrogenase 1                                           | HSD11B1     | Hs.195040  | 10.86 | 1.7E-03 | chr1q32-q41          |
| SAM domain and HD domain 1                                                         | SAMHD1      | Hs.580681  | 10.80 | 3.5E-03 | chr20pter-q12        |
| complement component 3                                                             | C3          | Hs.529053  | 10.59 | 3.4E-03 | chr19p13.3-p13.2     |
| nuclear factor of kappa light polypeptide gene enhancer in B-cells inhibitor, zeta | NFKBIZ      | Hs.319171  | 10.27 | 4.2E-03 | chr3p12-q12          |
| cathepsin S                                                                        | CTSS        | Hs.181301  | 10.10 | 3.6E-03 | chr1q21              |
| tumor necrosis factor, alpha-induced protein 6                                     | TNFAIP6     | Hs.437322  | 10.06 | 1.8E-03 | chr2q23.3            |
| chemokine (C-C motif) ligand 5                                                     | CCL5        | Hs.514821  | 9.97  | 3.4E-03 | chr17q11.2-q12       |
| tryptophan 2,3-dioxygenase                                                         | TDO2        | Hs.183671  | 9.87  | 4.6E-03 | chr4q31-q32          |
| baculoviral IAP repeat-containing 3                                                | BIRC3       | Hs.127799  | 9.07  | 1.2E-03 | chr11q22             |
| tissue factor pathway inhibitor 2                                                  | TFPI2       | Hs.438231  | 8.97  | 6.7E-03 | chr7q22              |
| 234987_at                                                                          |             | Hs.660221  | 8.56  | 1.9E-03 |                      |
| mitogen-activated protein kinase kinase kinase 8                                   | MAP3K8      | Hs.432453  | 8.50  | 6.5E-03 | chr10p11.23          |
| chromosome 8 open reading frame 4                                                  | C8orf4      | Hs.591849  | 8.19  | 1.2E-03 | chr8p11.2            |
| 2'-5'-oligoadenylate synthetase 3, 100kDa                                          | OAS3        | Hs.528634  | 8.19  | 1.1E-03 | chr12q24.2           |
| serpin peptidase inhibitor, clade B (ovalbumin), member 2                          | SERPINB2    | Hs.594481  | 8.10  | 3.5E-03 | chr18q21.3           |
| mesenchyme homeobox 1                                                              | MEOX1       | Hs.438     | 7.84  | 1.2E-03 | chr17q21             |
| myocardin                                                                          | MYOCD       | Hs.567641  | 7.82  | 4.0E-03 | chr17p11.2           |
| interleukin 11                                                                     | IL11        | Hs.467304  | 7.78  | 4.2E-03 | chr19q13.3-q13.4     |
| zinc finger CCCH-type containing 12A                                               | ZC3H12A     | Hs.656294  | 7.75  | 3.9E-03 | chr1p34.3            |
| transient receptor potential cation channel, subfamily A, member 1                 | TRPA1       | Hs.716816  | 7.65  | 2.1E-03 | chr8q13              |
| claudin 1                                                                          | CLDN1       | Hs.439060  | 7.45  | 3.8E-03 | chr3q28-q29          |
| BCL2-related protein A1                                                            | BCL2A1      | Hs.227817  | 7.42  | 1.1E-02 | chr15q24.3           |
| kynureninase (L-kynurenine hydrolase)                                              | KYNU        | Hs.470126  | 7.34  | 7.5E-03 | chr2q22.2            |
| six transmembrane epithelial antigen of the prostate 2                             | STEAP2      | Hs.489051  | 7.32  | 2.3E-03 | chr7q21              |
| tumor necrosis factor (ligand) superfamily, member 10                              | TNFSF10     | Hs.478275  | 7.16  | 6.8E-03 | chr3q26              |
| 2'-5'-oligoadenylate synthetase 2, 69/71kDa                                        | OAS2        | Hs.414332  | 7.09  | 6.8E-03 | chr12q24.2           |

**SM-Table 1: Genes Significantly Upregulated (>2 fold, p<0.05) in HTM Cells Phagocytically Challenged to E. coli Under Physiological Conditions**

| Gene Title                                                                            | Gene Symbol | UniGene ID | Fold | PValue  | Chromosomal Location |
|---------------------------------------------------------------------------------------|-------------|------------|------|---------|----------------------|
| XIAP associated factor 1                                                              | XAF1        | Hs.441975  | 6.63 | 1.2E-03 | chr17p13.2           |
| angiopoietin-like 1                                                                   | ANGPTL1     | Hs.591474  | 6.48 | 2.9E-03 | chr1q25.2            |
| ST3 beta-galactoside alpha-2,3-sialyltransferase 6                                    | ST3GAL6     | Hs.148716  | 6.36 | 5.0E-03 | chr3q12.1            |
| DEAD (Asp-Glu-Ala-Asp) box polypeptide 58                                             | DDX58       | Hs.190622  | 6.23 | 4.7E-03 | chr9p12              |
| interleukin 32                                                                        | IL32        | Hs.943     | 6.20 | 4.1E-03 | chr16p13.3           |
| DEAD (Asp-Glu-Ala-Asp) box polypeptide 60                                             | DDX60       | Hs.591710  | 6.10 | 1.9E-03 | chr4q32.3            |
| six transmembrane epithelial antigen of the prostate 1                                | STEAP1      | Hs.61635   | 6.03 | 2.7E-03 | chr7q21              |
| insulin-like growth factor 1 (somatomedin C)                                          | IGF1        | Hs.160562  | 5.97 | 7.3E-03 | chr12q22-q23         |
| F-box protein 32                                                                      | FBXO32      | Hs.403933  | 5.62 | 4.6E-03 | chr8q24.13           |
| tripartite motif-containing 14                                                        | TRIM14      | Hs.575631  | 5.54 | 2.9E-03 | chr9q22.33           |
| tumor necrosis factor, alpha-induced protein 2                                        | TNFAIP2     | Hs.525607  | 5.53 | 2.1E-03 | chr14q32             |
| hect domain and RLD 5                                                                 | HERC5       | Hs.26663   | 5.52 | 2.7E-03 | chr4q22.1            |
| interferon-induced protein with tetratricopeptide repeats 2                           | IFIT2       | Hs.437609  | 5.47 | 3.8E-03 | chr10q23-q25         |
| bradykinin receptor B1                                                                | BDKRB1      | Hs.525572  | 5.45 | 4.7E-03 | chr14q32.1-q32.2     |
| signal transducer and activator of transcription 1, 91kDa                             | STAT1       | Hs.715518  | 5.43 | 2.1E-03 | chr2q32.2            |
| leukemia inhibitory factor (cholinergic differentiation factor)                       | LIF         | Hs.2250    | 5.38 | 3.4E-03 | chr22q12.2           |
| chemokine (C-X-C motif) ligand 6 (granulocyte chemotactic protein 2)                  | CXCL6       | Hs.164021  | 5.30 | 7.7E-03 | chr4q21              |
| nicotinamide phosphoribosyltransferase                                                | NAMPT       | Hs.489615  | 5.25 | 3.3E-03 | chr7q22.2            |
| nuclear factor (erythroid-derived 2)-like 3                                           | NFE2L3      | Hs.404741  | 5.07 | 6.0E-03 | chr7p15-p14          |
| 229339_at                                                                             |             | Hs.462257  | 4.93 | 4.6E-03 |                      |
| interleukin-1 receptor-associated kinase 2                                            | IRAK2       | Hs.449207  | 4.90 | 6.4E-03 | chr3p25.3            |
| GTP cyclohydrolase 1                                                                  | GCH1        | Hs.86724   | 4.87 | 3.3E-03 | chr14q22.1-q22.2     |
| interferon regulatory factor 7                                                        | IRF7        | Hs.166120  | 4.86 | 2.8E-03 | chr11p15.5           |
| tumor necrosis factor (ligand) superfamily, member 13b                                | TNFSF13B    | Hs.525157  | 4.83 | 2.1E-03 | chr13q32-q34         |
| prostaglandin-endoperoxide synthase 2 (prostaglandin G/H synthase and cyclooxygenase) | PTGS2       | Hs.196384  | 4.82 | 2.1E-03 | chr1q25.2-q25.3      |
| damage-regulated autophagy modulator                                                  | DRAM        | Hs.525634  | 4.79 | 2.1E-03 | chr12q23.2           |
| intercellular adhesion molecule 1                                                     | ICAM1       | Hs.643447  | 4.75 | 5.6E-03 | chr19p13.3-p13.2     |
| metallothionein 1F                                                                    | MT1F        | Hs.513626  | 4.73 | 6.5E-03 | chr16q13             |
| matrix metalloproteinase 1 (interstitial collagenase)                                 | MMP1        | Hs.83169   | 4.61 | 3.2E-03 | chr11q22.3           |
| zona pellucida glycoprotein 4                                                         | ZP4         | Hs.136241  | 4.60 | 4.6E-03 | chr1q43              |
| endothelial cell-specific molecule 1                                                  | ESM1        | Hs.129944  | 4.60 | 3.1E-02 | chr5q11.2            |
| delta/notch-like EGF repeat containing                                                | DNER        | Hs.234074  | 4.57 | 5.2E-03 | chr2q36.3            |
| vascular cell adhesion molecule 1                                                     | VCAM1       | Hs.109225  | 4.43 | 2.1E-03 | chr1p32-p31          |

**SM-Table 1: Genes Significantly Upregulated (>2 fold, p<0.05) in HTM Cells Phagocytically Challenged to E. coli Under Physiological Conditions**

| Gene Title                                                                          | Gene Symbol           | UniGene ID | Fold | PValue  | Chromosomal Location  |
|-------------------------------------------------------------------------------------|-----------------------|------------|------|---------|-----------------------|
| bone morphogenetic protein 2                                                        | BMP2                  | Hs.73853   | 4.43 | 2.5E-03 | chr20p12              |
| phospholipid scramblase 1                                                           | PLSCR1                | Hs.130759  | 4.40 | 2.8E-03 | chr3q23               |
| nuclear factor of kappa light polypeptide gene enhancer in B-cells inhibitor, alpha | NFKBIA                | Hs.81328   | 4.39 | 2.1E-03 | chr14q13              |
| signal transducer and activator of transcription 4                                  | STAT4                 | Hs.80642   | 4.39 | 6.1E-03 | chr2q32.2-q32.3       |
| 5-hydroxytryptamine (serotonin) receptor 2A                                         | HTR2A                 | Hs.654586  | 4.35 | 4.7E-03 | chr13q14-q21          |
| interferon-induced protein 35                                                       | IFI35                 | Hs.632258  | 4.25 | 5.8E-03 | chr17q21              |
| similar to hCG38149 /// ovostatin /// ovostatin 2                                   | LOC728715 / Hs.568152 |            | 4.19 | 3.9E-03 | chr12p11.21 /// chr1: |
| PR domain containing 1, with ZNF domain                                             | PRDM1                 | Hs.436023  | 4.19 | 8.4E-03 | chr6q21-q22.1         |
| adenosine monophosphate deaminase (isoform E)                                       | AMPD3                 | Hs.501890  | 4.19 | 2.5E-03 | chr11p15              |
| 2'-5'-oligoadenylate synthetase-like                                                | OASL                  | Hs.118633  | 4.16 | 4.7E-03 | chr12q24.2            |
| interferon-induced protein 44                                                       | IFI44                 | Hs.82316   | 4.15 | 2.1E-03 | chr1p31.1             |
| vanin 3                                                                             | VNN3                  | Hs.183656  | 4.13 | 4.9E-03 | chr6q23-q24           |
| solute carrier family 39 (zinc transporter), member 14                              | SLC39A14              | Hs.491232  | 4.13 | 4.1E-03 | chr8p21.3             |
| indoleamine 2,3-dioxygenase 1                                                       | IDO1                  | Hs.840     | 4.11 | 1.2E-02 | chr8p12-p11           |
| regulator of calcineurin 1                                                          | RCAN1                 | Hs.282326  | 4.01 | 6.0E-03 | chr21q22.1-q22.2 21   |
| Norrie disease (pseudoglioma)                                                       | NDP                   | Hs.522615  | 3.90 | 1.4E-02 | chrXp11.4             |
| deiodinase, iodothyronine, type II                                                  | DIO2                  | Hs.202354  | 3.83 | 3.7E-03 | chr14q24.2-q24.3      |
| interleukin-1 receptor-associated kinase 3                                          | IRAK3                 | Hs.369265  | 3.83 | 1.0E-02 | chr12q14.3            |
| interleukin 18 binding protein                                                      | IL18BP                | Hs.591967  | 3.82 | 2.0E-03 | chr11q13              |
| chitinase 3-like 1 (cartilage glycoprotein-39)                                      | CHI3L1                | Hs.382202  | 3.82 | 8.8E-03 | chr1q32.1             |
| retinoic acid receptor responder (tazarotene induced) 1                             | RARRES1               | Hs.131269  | 3.72 | 7.9E-03 | chr3q25.32-q25.33     |
| v-maf musculoaponeurotic fibrosarcoma oncogene homolog F (avian)                    | MAFF                  | Hs.517617  | 3.71 | 3.9E-03 | chr22q13.1            |
| 235438_at                                                                           |                       | Hs.657330  | 3.70 | 4.2E-02 |                       |
| sclerosteosis                                                                       | SOST                  | Hs.349204  | 3.67 | 1.7E-02 | chr17q11.2            |
| toll-like receptor 2                                                                | TLR2                  | Hs.519033  | 3.67 | 1.9E-03 | chr4q32               |
| ABI family, member 3 (NESH) binding protein                                         | ABI3BP                | Hs.477015  | 3.65 | 5.1E-03 | chr3q12               |
| tumor necrosis factor (ligand) superfamily, member 18                               | TNFSF18               | Hs.248197  | 3.65 | 7.2E-03 | chr1q23               |
| solute carrier family 15, member 3                                                  | SLC15A3               | Hs.237856  | 3.61 | 5.5E-03 | chr11q12.2            |
| nuclear receptor subfamily 4, group A, member 2                                     | NR4A2                 | Hs.563344  | 3.60 | 3.5E-03 | chr2q22-q23           |
| interferon, gamma-inducible protein 30                                              | IFI30                 | Hs.14623   | 3.59 | 2.5E-03 | chr19p13.1            |
| histone cluster 2, H2aa3 /// histone cluster 2, H2aa4                               | HIST2H2AA3            | Hs.530461  | 3.57 | 1.4E-02 | chr1q21.2             |
| sterile alpha motif domain containing 9-like                                        | SAMD9L                | Hs.489118  | 3.56 | 2.3E-03 | chr7q21.2-q21.3       |
| v-yes-1 Yamaguchi sarcoma viral related oncogene homolog                            | LYN                   | Hs.699154  | 3.54 | 6.8E-03 | chr8q13               |

**SM-Table 1: Genes Significantly Upregulated (>2 fold, p<0.05) in HTM Cells Phagocytically Challenged to E. coli Under Physiological Conditions**

| Gene Title                                                                                    | Gene Symbol | UniGene ID | Fold | PValue  | Chromosomal Location |
|-----------------------------------------------------------------------------------------------|-------------|------------|------|---------|----------------------|
| poly (ADP-ribose) polymerase family, member 12                                                | PARP12      | Hs.12646   | 3.54 | 2.2E-03 | chr7q34              |
| spermidine/spermine N1-acetyltransferase 1                                                    | SAT1        | Hs.28491   | 3.51 | 4.2E-03 | chrXp22.1            |
| 244130_at                                                                                     |             | Hs.72630   | 3.47 | 4.3E-03 |                      |
| poly (ADP-ribose) polymerase family, member 14                                                | PARP14      | Hs.518203  | 3.44 | 3.2E-03 | chr3q21.1            |
| pigeon homolog (Drosophila)                                                                   | PION        | Hs.186649  | 3.42 | 7.5E-03 | chr7q11.23           |
| solute carrier family 11 (proton-coupled divalent metal ion transporters), member 2           | SLC11A2     | Hs.505545  | 3.42 | 1.8E-03 | chr12q13             |
| matrix metalloproteinase 8 (neutrophil collagenase)                                           | MMP8        | Hs.161839  | 3.39 | 5.7E-03 | chr11q22.3           |
| Epithelial stromal interaction 1 (breast)                                                     | EPST11      | Hs.546467  | 3.38 | 2.1E-03 | chr13q13.3           |
| Wilms tumor 1 associated protein                                                              | WTAP        | Hs.446091  | 3.36 | 3.4E-03 | chr6q25-q27          |
| sperm associated antigen 4                                                                    | SPAG4       | Hs.123159  | 3.36 | 8.2E-03 | chr20q11.21          |
| interleukin 1, alpha                                                                          | IL1A        | Hs.1722    | 3.36 | 2.7E-03 | chr2q14              |
| sterile alpha motif domain containing 9                                                       | SAMD9       | Hs.65641   | 3.34 | 2.1E-03 | chr7q21.2            |
| ubiquitin specific peptidase 18                                                               | USP18       | Hs.38260   | 3.34 | 7.1E-03 | chr22q11.21          |
| nuclear receptor subfamily 4, group A, member 3                                               | NR4A3       | Hs.279522  | 3.33 | 3.8E-03 | chr9q22              |
| v-rel reticuloendotheliosis viral oncogene homolog B                                          | RELB        | Hs.654402  | 3.32 | 9.1E-03 | chr19q13.32          |
| interferon induced transmembrane protein 1 (9-27)                                             | IFITM1      | Hs.458414  | 3.31 | 3.0E-03 | chr11p15.5           |
| ELOVL family member 7, elongation of long chain fatty acids (yeast)                           | ELOVL7      | Hs.274256  | 3.30 | 4.9E-03 | chr5q12.1            |
| Uncharacterized protein LOC100131897                                                          | LOC1001318  | Hs.659330  | 3.30 | 5.0E-03 | chr5q35.1            |
| metallothionein 1G                                                                            | MT1G        | Hs.433391  | 3.30 | 5.7E-03 | chr16q13             |
| cholesterol 25-hydroxylase                                                                    | CH25H       | Hs.47357   | 3.29 | 2.1E-03 | chr10q23             |
| solute carrier family 19, member 3                                                            | SLC19A3     | Hs.221597  | 3.27 | 4.1E-03 | chr2q37              |
| membrane-associated ring finger (C3HC4) 3                                                     | MARCH3      | Hs.132441  | 3.27 | 6.1E-03 | chr5q23.2            |
| serpin peptidase inhibitor, clade E (nexin, plasminogen activator inhibitor type 1), member 1 | SERPINE1    | Hs.414795  | 3.17 | 3.7E-03 | chr7q21.3-q22        |
| receptor (chemosensory) transporter protein 4                                                 | RTP4        | Hs.43388   | 3.15 | 2.3E-03 | chr3q27.3            |
| epiregulin                                                                                    | EREG        | Hs.115263  | 3.14 | 2.3E-02 | chr4q13.3            |
| ring finger protein 144B                                                                      | RNF144B     | Hs.148741  | 3.14 | 2.7E-03 | chr6p22.3            |
| cingulin-like 1                                                                               | CGNL1       | Hs.148989  | 3.14 | 1.1E-02 | chr15q21.3           |
| family with sequence similarity 65, member C                                                  | FAM65C      | Hs.372578  | 3.13 | 5.3E-03 | chr20q13.13          |
| chromosome 6 open reading frame 176                                                           | C6orf176    | Hs.31917   | 3.13 | 3.7E-03 | chr6q27              |
| CCAAT/enhancer binding protein (C/EBP), delta                                                 | CEBPD       | Hs.440829  | 3.12 | 5.2E-03 | chr8p11.2-p11.1      |
| tumor necrosis factor receptor superfamily, member 11b                                        | TNFRSF11B   | Hs.81791   | 3.12 | 1.8E-03 | chr8q24              |
| KIAA0146                                                                                      | KIAA0146    | Hs.381058  | 3.12 | 3.9E-03 | chr8q11.21           |
| neuronal cell adhesion molecule                                                               | NRCAM       | Hs.21422   | 3.11 | 2.8E-03 | chr7q31.1-q31.2      |

**SM-Table 1: Genes Significantly Upregulated (>2 fold, p<0.05) in HTM Cells Phagocytically Challenged to E. coli Under Physiological Conditions**

| Gene Title                                                                                          | Gene Symbol  | UniGene ID | Fold | PValue  | Chromosomal Location |
|-----------------------------------------------------------------------------------------------------|--------------|------------|------|---------|----------------------|
| metallothionein 1X                                                                                  | MT1X         | Hs.374950  | 3.10 | 9.4E-03 | chr16q13             |
| carbonic anhydrase XII                                                                              | CA12         | Hs.210995  | 3.09 | 3.9E-03 | chr15q22             |
| proteasome (prosome, macropain) subunit, beta type, 9 (large multifunctional peptidase 2)           | PSMB9        | Hs.654585  | 3.04 | 1.1E-02 | chr6p21.3            |
| nuclear factor of kappa light polypeptide gene enhancer in B-cells 2 (p49/p100)                     | NFKB2        | Hs.73090   | 3.03 | 2.5E-03 | chr10q24             |
| 225328_at                                                                                           |              | Hs.592775  | 3.02 | 2.1E-03 |                      |
| acyl-CoA synthetase long-chain family member 4                                                      | ACSL4        | Hs.268785  | 3.01 | 9.1E-03 | chrXq22.3-q23        |
| 210524_x_at                                                                                         |              |            | 3.01 | 1.1E-02 |                      |
| BCL2/adenovirus E1B 19kDa interacting protein 3                                                     | BNIP3        | Hs.144873  | 2.98 | 6.7E-03 | chr10q26.3           |
| dipeptidyl-peptidase 4                                                                              | DPP4         | Hs.368912  | 2.98 | 8.2E-03 | chr2q24.3            |
| potassium inwardly-rectifying channel, subfamily J, member 15                                       | KCNJ15       | Hs.411299  | 2.96 | 3.1E-03 | chr21q22.2           |
| podoplanin                                                                                          | PDPN         | Hs.468675  | 2.96 | 1.8E-03 | chr1p36.21           |
| thymidine phosphorylase                                                                             | TYMP         | Hs.592212  | 2.92 | 2.9E-03 | chr22q13 22q13.33    |
| leucine aminopeptidase 3                                                                            | LAP3         | Hs.570791  | 2.91 | 7.6E-03 | chr4p15.32           |
| R-spondin 3 homolog (Xenopus laevis)                                                                | RSPO3        | Hs.135254  | 2.90 | 2.3E-03 | chr6q22.33           |
| caspase recruitment domain family, member 16                                                        | CARD16       | Hs.348365  | 2.83 | 5.8E-03 |                      |
| piccolo (presynaptic cytomatrix protein)                                                            | PCLO         | Hs.12376   | 2.81 | 1.0E-02 | chr7q11.23-q21.3     |
| metallothionein 1H                                                                                  | MT1H         | Hs.438462  | 2.78 | 8.4E-03 | chr16q13             |
| neurofilament, medium polypeptide                                                                   | NEFM         | Hs.458657  | 2.77 | 2.1E-02 | chr8p21              |
| metallothionein 1E /// metallothionein 1H /// metallothionein 1M /// metallothionein 1 pseudogene 2 | MT1E /// MT1 | Hs.534330  | 2.77 | 5.1E-03 | chr16q13 /// chr1q43 |
| betacellulin                                                                                        | BTC          | Hs.710156  | 2.75 | 2.4E-02 | chr4q13-q21          |
| DEAD (Asp-Glu-Ala-Asp) box polypeptide 60-like                                                      | DDX60L       | Hs.535011  | 2.75 | 8.4E-03 | chr4q32.3            |
| proteasome (prosome, macropain) activator subunit 2 (PA28 beta)                                     | PSME2        | Hs.434081  | 2.74 | 2.9E-03 | chr14q11.2           |
| RAS, dexamethasone-induced 1                                                                        | RASD1        | Hs.25829   | 2.73 | 1.4E-02 | chr17p11.2           |
| tumor necrosis factor (ligand) superfamily, member 11                                               | TNFSF11      | Hs.333791  | 2.72 | 5.2E-03 | chr13q14             |
| 229802_at                                                                                           |              | Hs.593316  | 2.72 | 6.3E-03 |                      |
| outer dense fiber of sperm tails 3B                                                                 | ODF3B        | Hs.531314  | 2.71 | 3.5E-03 | chr22q13.33          |
| 227458_at                                                                                           |              | Hs.655937  | 2.68 | 5.1E-03 |                      |
| vascular endothelial growth factor C                                                                | VEGFC        | Hs.435215  | 2.67 | 1.9E-03 | chr4q34.1-q34.3      |
| Meis homeobox 1                                                                                     | MEIS1        | Hs.526754  | 2.66 | 1.2E-02 | chr2p14-p13          |
| 244219_at                                                                                           |              | Hs.658454  | 2.66 | 4.6E-03 |                      |
| secreted frizzled-related protein 2                                                                 | SFRP2        | Hs.481022  | 2.65 | 9.4E-03 | chr4q31.3            |

**SM-Table 1: Genes Significantly Upregulated (>2 fold, p<0.05) in HTM Cells Phagocytically Challenged to E. coli Under Physiological Conditions**

| Gene Title                                                                                                                     | Gene Symbol | UniGene ID | Fold | PValue  | Chromosomal Location |
|--------------------------------------------------------------------------------------------------------------------------------|-------------|------------|------|---------|----------------------|
| PDZ domain containing 2                                                                                                        | PDZD2       | Hs.481819  | 2.65 | 1.2E-02 | chr5p13.3            |
| solute carrier family 16, member 3 (monocarboxylic acid transporter 4)                                                         | SLC16A3     | Hs.500761  | 2.64 | 3.4E-03 | chr17q25             |
| spermatogenesis associated 13                                                                                                  | SPATA13     | Hs.657121  | 2.64 | 3.8E-03 | chr13q12.12          |
| ADAM metallopeptidase domain 28                                                                                                | ADAM28      | Hs.174030  | 2.64 | 4.2E-02 | chr8p21.2            |
| interleukin 1, beta                                                                                                            | IL1B        | Hs.126256  | 2.64 | 1.8E-02 | chr2q14              |
| integrin, alpha 2 (CD49B, alpha 2 subunit of VLA-2 receptor)                                                                   | ITGA2       | Hs.482077  | 2.64 | 7.5E-03 | chr5q23-q31          |
| transmembrane protein 140                                                                                                      | TMEM140     | Hs.719309  | 2.64 | 1.3E-02 | chr7q33              |
| kinase insert domain receptor (a type III receptor tyrosine kinase)                                                            | KDR         | Hs.479756  | 2.63 | 1.1E-02 | chr4q11-q12          |
| suppressor of cytokine signaling 2                                                                                             | SOCS2       | Hs.485572  | 2.63 | 5.2E-03 | chr12q               |
| tripartite motif-containing 22                                                                                                 | TRIM22      | Hs.501778  | 2.63 | 3.8E-03 | chr11p15             |
| 1555852_at                                                                                                                     |             |            | 2.62 | 1.2E-02 |                      |
| calcium binding protein 1                                                                                                      | CABP1       | Hs.458482  | 2.62 | 2.2E-02 | chr12q24.31          |
| major histocompatibility complex, class I, B                                                                                   | HLA-B       | Hs.703277  | 2.61 | 2.5E-03 | chr6p21.3            |
| hypothetical protein LOC100132999                                                                                              | LOC1001329  | Hs.670106  | 2.61 | 5.1E-03 | chr1q21.1            |
| transporter 1, ATP-binding cassette, sub-family B (MDR/TAP)                                                                    | TAP1        | Hs.352018  | 2.61 | 4.9E-03 | chr6p21.3            |
| interferon stimulated exonuclease gene 20kDa                                                                                   | ISG20       | Hs.459265  | 2.57 | 7.9E-03 | chr15q26             |
| aldehyde oxidase 1                                                                                                             | AOX1        | Hs.406238  | 2.57 | 1.1E-02 | chr2q33              |
| cytochrome P450, family 7, subfamily B, polypeptide 1                                                                          | CYP7B1      | Hs.667720  | 2.57 | 5.6E-03 | chr8q21.3            |
| 239587_at                                                                                                                      |             | Hs.201600  | 2.57 | 3.4E-03 |                      |
| methylenetetrahydrofolate dehydrogenase (NADP+ dependent) 2-like                                                               | MTHFD2L     | Hs.479954  | 2.56 | 2.1E-03 | chr4q13.3            |
| solute carrier family 43, member 3                                                                                             | SLC43A3     | Hs.99962   | 2.56 | 2.1E-03 | chr11q11             |
| lectin, galactoside-binding, soluble, 3 binding protein /// similar to lectin, galactoside-binding, soluble, 3 binding protein | LGALS3BP // | Hs.514535  | 2.56 | 1.9E-03 | chr17q25             |
| peroxisomal proliferator-activated receptor A interacting complex 285                                                          | PRIC285     | Hs.517180  | 2.55 | 1.1E-02 | chr20q13.33          |
| metallothionein 1 pseudogene 2                                                                                                 | MT1P2       | Hs.632513  | 2.55 | 7.2E-03 | chr1q43              |
| neuronal PAS domain protein 2                                                                                                  | NPAS2       | Hs.156832  | 2.55 | 4.2E-03 | chr2q11.2            |
| bradykinin receptor B2                                                                                                         | BDKRB2      | Hs.719484  | 2.55 | 6.2E-03 | chr14q32.1-q32.2     |
| major histocompatibility complex, class I, F                                                                                   | HLA-F       | Hs.519972  | 2.54 | 2.5E-03 | chr6p21.3            |
| 232712_at                                                                                                                      |             | Hs.248049  | 2.54 | 7.5E-03 |                      |

**SM-Table 1: Genes Significantly Upregulated (>2 fold, p<0.05) in HTM Cells Phagocytically Challenged to E. coli Under Physiological Conditions**

| Gene Title                                                                        | Gene Symbol  | UniGene ID | Fold | PValue  | Chromosomal Location |
|-----------------------------------------------------------------------------------|--------------|------------|------|---------|----------------------|
| 230333_at                                                                         |              | Hs.656630  | 2.54 | 1.4E-02 |                      |
| G0/G1switch 2                                                                     | G0S2         | Hs.432132  | 2.53 | 7.8E-03 | chr1q32.2 1q32.2-q4  |
| GTP binding protein overexpressed in skeletal muscle                              | GEM          | Hs.654463  | 2.53 | 1.2E-02 | chr8q13-q21          |
| NK3 homeobox 1                                                                    | NKX3-1       | Hs.55999   | 2.51 | 1.5E-02 | chr8p21              |
| immediate early response 3                                                        | IER3         | Hs.591785  | 2.50 | 4.9E-03 | chr6p21.3            |
| hyaluronan synthase 2                                                             | HAS2         | Hs.159226  | 2.50 | 7.9E-03 | chr8q24.12           |
| caspase 1, apoptosis-related cysteine peptidase (interleukin 1, beta, convertase) | CASP1        | Hs.2490    | 2.49 | 5.7E-03 | chr11q23             |
| signal-regulatory protein alpha                                                   | SIRPA        | Hs.581021  | 2.49 | 5.3E-03 | chr20p13             |
| 6-phosphofructo-2-kinase/fructose-2,6-biphosphatase 4                             | PFKFB4       | Hs.476217  | 2.49 | 5.2E-03 | chr3p22-p21          |
| heat shock 27kDa protein 3                                                        | HSPB3        | Hs.41707   | 2.48 | 2.1E-03 | chr5q11.2            |
| agrin                                                                             | AGRN         | Hs.273330  | 2.48 | 4.9E-03 | chr1p36.33           |
| ubiquitin-conjugating enzyme E2L 6                                                | UBE2L6       | Hs.425777  | 2.47 | 7.9E-03 | chr11q12             |
| chromosome 7 open reading frame 68                                                | C7orf68      | Hs.710088  | 2.47 | 5.3E-03 | chr7q32.1            |
| proline-serine-threonine phosphatase interacting protein 2                        | PSTPIP2      | Hs.567384  | 2.46 | 6.3E-03 | chr18q12             |
| zinc finger CCCH-type containing 12C                                              | ZC3H12C      | Hs.376289  | 2.46 | 1.4E-02 | chr11q22.3           |
| metallothionein 2A                                                                | MT2A         | Hs.647371  | 2.46 | 7.7E-03 | chr16q13             |
| chromosome 1 open reading frame 38                                                | C1orf38      | Hs.10649   | 2.46 | 1.5E-02 | chr1p35.3            |
| gremlin 1, cysteine knot superfamily, homolog (Xenopus laevis)                    | GREM1        | Hs.40098   | 2.45 | 1.9E-03 | chr15q13-q15         |
| acyl-CoA synthetase long-chain family member 5                                    | ACSL5        | Hs.11638   | 2.45 | 7.4E-03 | chr10q25.1-q25.2     |
| chromosome 13 open reading frame 33                                               | C13orf33     | Hs.646647  | 2.44 | 9.5E-03 | chr13q12.3           |
| interleukin 1 receptor antagonist                                                 | IL1RN        | Hs.81134   | 2.44 | 2.1E-03 | chr2q14.2            |
| GATA binding protein 6                                                            | GATA6        | Hs.514746  | 2.44 | 5.0E-03 | chr18q11.1-q11.2     |
| EF-hand calcium binding domain 3 /// similar to hypoxia-inducible protein 2       | EFCAB3 /// L | Hs.152670  | 2.43 | 3.4E-03 | chr17q23.2           |
| musculin (activated B-cell factor-1)                                              | MSC          | Hs.442619  | 2.43 | 5.7E-03 | chr8q21              |
| 242907_at                                                                         |              |            | 2.43 | 6.9E-03 |                      |
| TNFAIP3 interacting protein 1                                                     | TNIP1        | Hs.355141  | 2.43 | 1.0E-02 | chr5q32-q33.1        |
| interleukin 15 receptor, alpha                                                    | IL15RA       | Hs.524117  | 2.43 | 8.7E-03 | chr10p15-p14         |
| CD82 molecule                                                                     | CD82         | Hs.527778  | 2.42 | 1.9E-03 | chr11p11.2           |
| major histocompatibility complex, class I, C                                      | HLA-C        | Hs.654404  | 2.41 | 7.8E-03 | chr6p21.3            |
| colony stimulating factor 3 (granulocyte)                                         | CSF3         | Hs.2233    | 2.41 | 7.6E-03 | chr17q11.2-q12       |
| interferon regulatory factor 9                                                    | IRF9         | Hs.1706    | 2.40 | 7.6E-03 | chr14q11.2           |
| tumor necrosis factor receptor superfamily, member 21                             | TNFRSF21     | Hs.443577  | 2.40 | 1.2E-02 | chr6p21.1-p12.2      |



**SM-Table 1: Genes Significantly Upregulated (>2 fold, p<0.05) in HTM Cells Phagocytically Challenged to E. coli Under Physiological Conditions**

| Gene Title                                                          | Gene Symbol | UniGene ID | Fold | PValue  | Chromosomal Location |
|---------------------------------------------------------------------|-------------|------------|------|---------|----------------------|
| HECT, C2 and WW domain containing E3 ubiquitin protein ligase 2     | HECW2       | Hs.654742  | 2.40 | 2.2E-03 | chr2q32.3-q33.1      |
| dystrobrevin, alpha                                                 | DTNA        | Hs.643454  | 2.40 | 1.1E-02 | chr18q12             |
| pleckstrin homology-like domain, family A, member 1                 | PHLDA1      | Hs.602085  | 2.39 | 2.9E-03 | chr12q15             |
| C-type lectin domain family 2, member B                             | CLEC2B      | Hs.85201   | 2.38 | 1.1E-02 | chr12p13-p12         |
| solute carrier family 22, member 23                                 | SLC22A23    | Hs.713588  | 2.38 | 2.8E-03 | chr6p25.2            |
| platelet factor 4 variant 1                                         | PF4V1       | Hs.72933   | 2.38 | 1.5E-02 | chr4q12-q21          |
| RAS guanyl releasing protein 1 (calcium and DAG-regulated)          | RASGRP1     | Hs.591127  | 2.37 | 2.1E-03 | chr15q14             |
| adenylate kinase 3-like 1                                           | AK3L1       | Hs.592601  | 2.37 | 4.1E-03 | chr1p31.3            |
| LIM and cysteine-rich domains 1                                     | LMCD1       | Hs.475353  | 2.37 | 1.2E-02 | chr3p26-p24          |
| poly (ADP-ribose) polymerase family, member 9                       | PARP9       | Hs.518200  | 2.37 | 6.9E-03 | chr3q21              |
| C1q and tumor necrosis factor related protein 1                     | C1QTNF1     | Hs.201398  | 2.36 | 1.0E-02 | chr17q25.3           |
| apolipoprotein B mRNA editing enzyme, catalytic polypeptide-like 3G | APOBEC3G    | Hs.660143  | 2.35 | 1.1E-02 | chr22q13.1-q13.2     |
| endoplasmic reticulum aminopeptidase 2                              | ERAP2       | Hs.482910  | 2.35 | 2.6E-02 | chr5q15              |
| G protein-coupled receptor, family C, group 5, member B             | GPRC5B      | Hs.148685  | 2.35 | 4.2E-03 | chr16p12             |
| mannosidase, alpha, class 1A, member 1                              | MAN1A1      | Hs.102788  | 2.35 | 8.3E-03 | chr6q22              |
| early growth response 2                                             | EGR2        | Hs.1395    | 2.34 | 2.3E-03 | chr10q21.1           |
| hypothetical protein FLJ36031                                       | FLJ36031    | Hs.29692   | 2.33 | 1.1E-02 | chr7q22.3            |
| chemokine (C-X-C motif) ligand 16                                   | CXCL16      | Hs.711652  | 2.33 | 3.5E-03 | chr17p13             |
| tripartite motif-containing 69                                      | TRIM69      | Hs.489254  | 2.33 | 6.8E-03 | chr15q21.1           |
| gap junction protein, delta 3, 31.9kDa                              | GJD3        | Hs.444663  | 2.33 | 2.7E-02 | chr17q21.2           |
| 236480_at                                                           |             | Hs.446388  | 2.33 | 3.9E-03 |                      |
| lipoprotein lipase                                                  | LPL         | Hs.180878  | 2.32 | 8.7E-03 | chr8p22              |
| deltex 3-like (Drosophila)                                          | DTX3L       | Hs.518201  | 2.32 | 4.5E-03 | chr3q21.1            |
| egl nine homolog 3 (C. elegans)                                     | EGLN3       | Hs.135507  | 2.32 | 2.4E-02 | chr14q13.1           |
| fibroblast growth factor 10                                         | FGF10       | Hs.664499  | 2.31 | 1.6E-02 | chr5p13-p12          |
| serglycin                                                           | SRGN        | Hs.1908    | 2.31 | 4.1E-03 | chr10q22.1           |
| pannexin 1                                                          | PANX1       | Hs.591976  | 2.31 | 2.9E-03 | chr11q21             |
| glycoprotein M6B                                                    | GPM6B       | Hs.495710  | 2.31 | 6.5E-03 | chrXp22.2            |
| toll-like receptor 1                                                | TLR1        | Hs.654532  | 2.31 | 6.4E-03 | chr4p14              |
| 235661_at                                                           |             | Hs.649101  | 2.30 | 3.9E-02 |                      |
| similar to WDNM1-like protein                                       | LOC645638   | Hs.463652  | 2.30 | 6.7E-03 | chr17q23.1           |
| family with sequence similarity 20, member A                        | FAM20A      | Hs.268874  | 2.30 | 7.5E-03 | chr17q24.2           |
| oxidized low density lipoprotein (lectin-like) receptor 1           | OLR1        | Hs.412484  | 2.30 | 2.5E-02 | chr12p13.2-p12.3     |

**SM-Table 1: Genes Significantly Upregulated (>2 fold, p<0.05) in HTM Cells Phagocytically Challenged to E. coli Under Physiological Conditions**

| Gene Title                                                                     | Gene Symbol    | UniGene ID | Fold | PValue  | Chromosomal Location  |
|--------------------------------------------------------------------------------|----------------|------------|------|---------|-----------------------|
| prostaglandin E synthase                                                       | PTGES          | Hs.146688  | 2.29 | 9.3E-03 | chr9q34.3             |
| sorbin and SH3 domain containing 2                                             | SORBS2         | Hs.655143  | 2.29 | 5.2E-03 | chr4q35.1             |
| twist homolog 2 (Drosophila)                                                   | TWIST2         | Hs.422585  | 2.28 | 1.3E-02 | chr2q37.3             |
| guanylate binding protein 1, interferon-inducible, 67kDa                       | GBP1           | Hs.62661   | 2.28 | 3.3E-03 | chr1p22.2             |
| procollagen-lysine, 2-oxoglutarate 5-dioxygenase 2                             | PLOD2          | Hs.477866  | 2.27 | 6.7E-03 | chr3q23-q24           |
| regulator of G-protein signaling 3                                             | RGS3           | Hs.494875  | 2.27 | 6.6E-03 | chr9q32               |
| toll-like receptor 3                                                           | TLR3           | Hs.657724  | 2.27 | 8.4E-03 | chr4q35               |
| protein kinase (cAMP-dependent, catalytic) inhibitor beta                      | PKIB           | Hs.719228  | 2.26 | 5.8E-03 | chr6q22.31            |
| prostaglandin I2 (prostacyclin) synthase                                       | PTGIS          | Hs.302085  | 2.26 | 1.8E-02 | chr20q13.13           |
| chemokine (C-X-C motif) ligand 9                                               | CXCL9          | Hs.77367   | 2.26 | 3.9E-03 | chr4q21               |
| colony stimulating factor 1 (macrophage)                                       | CSF1           | Hs.591402  | 2.26 | 1.9E-03 | chr1p21-p13           |
| tyrosinase-related protein 1                                                   | TYRP1          | Hs.270279  | 2.25 | 4.6E-03 | chr9p23               |
| interleukin 7 receptor                                                         | IL7R           | Hs.635723  | 2.24 | 7.1E-03 | chr5p13               |
| transporter 2, ATP-binding cassette, sub-family B (MDR/TAP)                    | TAP2           | Hs.502     | 2.24 | 2.1E-03 | chr6p21.3             |
| butyrophilin, subfamily 3, member A2                                           | BTN3A2         | Hs.376046  | 2.23 | 1.9E-03 | chr6p22.1             |
| histone cluster 1, H2bc                                                        | HIST1H2BC      | Hs.658713  | 2.23 | 1.0E-02 | chr6p21.3             |
| solute carrier family 7 (cationic amino acid transporter, y+ system), member 2 | SLC7A2         | Hs.448520  | 2.23 | 2.1E-03 | chr8p22-p21.3         |
| hypothetical protein LOC285628                                                 | LOC285628      | Hs.604728  | 2.23 | 3.1E-03 | chr5q34               |
| phosphoenolpyruvate carboxykinase 1 (soluble)                                  | PCK1           | Hs.1872    | 2.23 | 2.8E-02 | chr20q13.31           |
| major histocompatibility complex, class I, E                                   | HLA-E          | Hs.650174  | 2.23 | 6.1E-03 | chr6p21.3             |
| tumor-associated calcium signal transducer 2                                   | TACSTD2        | Hs.23582   | 2.22 | 1.4E-02 | chr1p32-p31           |
| basic leucine zipper transcription factor, ATF-like 2                          | BATF2          | Hs.124840  | 2.22 | 1.4E-02 | chr11q13.1            |
| phospholipase A2, group IVA (cytosolic, calcium-dependent)                     | PLA2G4A        | Hs.497200  | 2.21 | 1.3E-02 | chr1q25               |
| dual specificity phosphatase 4                                                 | DUSP4          | Hs.417962  | 2.21 | 7.2E-03 | chr8p12-p11           |
| transmembrane protein 132B                                                     | TMEM132B       | Hs.524838  | 2.21 | 2.8E-02 | chr12q24.31-q24.32    |
| 214124_x_at                                                                    |                | Hs.597151  | 2.21 | 2.1E-03 |                       |
| chromosome 11 open reading frame 17 /// NUAK family, SNF1-like kinase, 2       | C11orf17 /// N | Hs.131180  | 2.21 | 4.1E-03 | chr11p15.3 /// chr1q; |
| histone cluster 2, H2be                                                        | HIST2H2BE      | Hs.2178    | 2.20 | 7.3E-03 | chr1q21-q23           |
| BMP binding endothelial regulator                                              | BMPER          | Hs.660998  | 2.20 | 5.2E-03 | chr7p14.3             |
| 238743_at                                                                      |                | Hs.546523  | 2.19 | 2.4E-03 |                       |
| family with sequence similarity 26, member F                                   | FAM26F         | Hs.381220  | 2.19 | 1.2E-02 | chr6q22.1             |

**SM-Table 1: Genes Significantly Upregulated (>2 fold, p<0.05) in HTM Cells Phagocytically Challenged to E. coli Under Physiological Conditions**

| Gene Title                                                                                                                                                                                                                                                                 | Gene Symbol                                                                                             | UniGene ID | Fold | PValue  | Chromosomal Location                                |
|----------------------------------------------------------------------------------------------------------------------------------------------------------------------------------------------------------------------------------------------------------------------------|---------------------------------------------------------------------------------------------------------|------------|------|---------|-----------------------------------------------------|
| phospholipase A2, group IVC (cytosolic, calcium-independent)                                                                                                                                                                                                               | PLA2G4C                                                                                                 | Hs.631562  | 2.19 | 2.4E-02 | chr19q13.3                                          |
| microRNA host gene 2 (non-protein coding)                                                                                                                                                                                                                                  | MIRHG2                                                                                                  | Hs.697120  | 2.18 | 2.1E-03 |                                                     |
| Pelota homolog (Drosophila)                                                                                                                                                                                                                                                | PELO                                                                                                    | Hs.644352  | 2.18 | 1.9E-02 | chr5q11.2                                           |
| tribbles homolog 1 (Drosophila)                                                                                                                                                                                                                                            | TRIB1                                                                                                   | Hs.444947  | 2.17 | 2.4E-03 | chr8q24.13                                          |
| family with sequence similarity 162, member A                                                                                                                                                                                                                              | FAM162A                                                                                                 | Hs.584881  | 2.17 | 1.2E-02 | chr3q21.1                                           |
| major histocompatibility complex, class I, A /// major histocompatibility complex, class I, B /// major histocompatibility complex, class I, G /// major histocompatibility complex, class I, H (pseudogene) /// major histocompatibility complex, class I, J (pseudogene) | HLA-A /// HLA-B /// HLA-C /// HLA-DPA1 /// HLA-DPB1 /// HLA-DQA1 /// HLA-DQB1 /// HLA-DQA2 /// HLA-DQB2 | Hs.181244  | 2.16 | 1.8E-03 | chr6p21.3 /// chr6p21.3 /// chr6p21.3 /// chr6p21.3 |
| glycerol kinase                                                                                                                                                                                                                                                            | GK                                                                                                      | Hs.1466    | 2.16 | 1.6E-02 | chrXp21.3                                           |
| 230741_at                                                                                                                                                                                                                                                                  |                                                                                                         | Hs.439682  | 2.15 | 9.1E-03 |                                                     |
| proprotein convertase subtilisin/kexin type 1                                                                                                                                                                                                                              | PCSK1                                                                                                   | Hs.78977   | 2.14 | 2.3E-02 | chr5q15-q21                                         |
| paroxysmal nonkinesigenic dyskinesia                                                                                                                                                                                                                                       | PNKD                                                                                                    | Hs.98475   | 2.14 | 4.3E-03 | chr2q35                                             |
| sidekick homolog 1, cell adhesion molecule (chicken)                                                                                                                                                                                                                       | SDK1                                                                                                    | Hs.653013  | 2.13 | 3.4E-02 | chr7p22.2                                           |
| dual specificity phosphatase 6                                                                                                                                                                                                                                             | DUSP6                                                                                                   | Hs.298654  | 2.13 | 1.1E-02 | chr12q22-q23                                        |
| SP100 nuclear antigen                                                                                                                                                                                                                                                      | SP100                                                                                                   | Hs.369056  | 2.13 | 5.1E-03 | chr2q37.1                                           |
| UDP-glucose ceramide glucosyltransferase                                                                                                                                                                                                                                   | UGCG                                                                                                    | Hs.304249  | 2.12 | 8.6E-03 | chr9q31                                             |
| inhibin, beta A                                                                                                                                                                                                                                                            | INHBA                                                                                                   | Hs.583348  | 2.12 | 6.7E-03 | chr7p15-p13                                         |
| 227621_at                                                                                                                                                                                                                                                                  |                                                                                                         | Hs.708272  | 2.12 | 5.7E-03 |                                                     |
| plasminogen activator, urokinase receptor                                                                                                                                                                                                                                  | PLAUR                                                                                                   | Hs.466871  | 2.11 | 9.2E-03 | chr19q13                                            |
| neuronal PAS domain protein 2                                                                                                                                                                                                                                              | NPAS2                                                                                                   | Hs.156832  | 2.11 | 1.9E-02 | chr2q11.2                                           |
| HLA complex P5                                                                                                                                                                                                                                                             | HCP5                                                                                                    | Hs.654480  | 2.10 | 4.4E-02 | chr6p21.3                                           |
| piwi-like 4 (Drosophila)                                                                                                                                                                                                                                                   | PIWIL4                                                                                                  |            | 2.10 | 1.1E-02 | chr11q21                                            |
| POU class 2 homeobox 2                                                                                                                                                                                                                                                     | POU2F2                                                                                                  | Hs.654420  | 2.10 | 4.8E-03 | chr19q13.2                                          |
| 1558365_at                                                                                                                                                                                                                                                                 |                                                                                                         | Hs.605605  | 2.09 | 1.6E-02 |                                                     |
| ATP-binding cassette, sub-family A (ABC1), member 6                                                                                                                                                                                                                        | ABCA6                                                                                                   | Hs.709514  | 2.09 | 3.4E-02 | chr17q24.3                                          |
| 227140_at                                                                                                                                                                                                                                                                  |                                                                                                         | Hs.28792   | 2.08 | 1.8E-03 |                                                     |
| pregnancy-associated plasma protein A, pappalysin 1                                                                                                                                                                                                                        | PAPPA                                                                                                   | Hs.643599  | 2.08 | 1.4E-02 | chr9q33.2                                           |
| junctional adhesion molecule 2                                                                                                                                                                                                                                             | JAM2                                                                                                    | Hs.517227  | 2.08 | 5.0E-03 | chr21q21.2                                          |
| aryl hydrocarbon receptor nuclear translocator-like 2                                                                                                                                                                                                                      | ARNTL2                                                                                                  | Hs.434269  | 2.07 | 1.3E-02 | chr12p12.2-p11.2                                    |
| synuclein, alpha interacting protein                                                                                                                                                                                                                                       | SNCAIP                                                                                                  | Hs.426463  | 2.07 | 2.8E-03 | chr5q23.1-q23.3                                     |
| coagulation factor III (thromboplastin, tissue factor)                                                                                                                                                                                                                     | F3                                                                                                      | Hs.62192   | 2.07 | 1.2E-02 | chr1p22-p21                                         |
| FOS-like antigen 1                                                                                                                                                                                                                                                         | FOSL1                                                                                                   | Hs.283565  | 2.07 | 9.3E-03 | chr11q13                                            |

**SM-Table 1: Genes Significantly Upregulated (>2 fold, p<0.05) in HTM Cells Phagocytically Challenged to E. coli Under Physiological Conditions**

| Gene Title                                                             | Gene Symbol | UniGene ID | Fold | PValue  | Chromosomal Location |
|------------------------------------------------------------------------|-------------|------------|------|---------|----------------------|
| 237365_at                                                              |             | Hs.43818   | 2.07 | 5.5E-03 |                      |
| Hypothetical protein LOC100128718                                      | LOC1001287  | Hs.707915  | 2.06 | 4.6E-03 | chr19p13.11          |
| interferon-induced protein with tetratricopeptide repeats 5            | IFIT5       | Hs.252839  | 2.06 | 3.2E-03 | chr10q23.31          |
| chromosome 6 open reading frame 192                                    | C6orf192    | Hs.347144  | 2.06 | 1.3E-03 | chr6q22.3-q23.3      |
| major histocompatibility complex, class I, G                           | HLA-G       | Hs.512152  | 2.06 | 4.2E-03 | chr6p21.3            |
| ATPase type 13A3                                                       | ATP13A3     | Hs.529609  | 2.06 | 3.8E-03 | chr3q29              |
| solute carrier family 2 (facilitated glucose transporter), member 6    | SLC2A6      | Hs.244378  | 2.05 | 9.1E-03 | chr9q34              |
| chromosome 7 open reading frame 58                                     | C7orf58     | Hs.189652  | 2.05 | 2.7E-03 | chr7q31.31           |
| CD38 molecule                                                          | CD38        | Hs.479214  | 2.05 | 2.2E-02 | chr4p15              |
| interleukin 18 receptor 1                                              | IL18R1      | Hs.469521  | 2.05 | 1.2E-02 | chr2q12              |
| chromosome 19 open reading frame 66                                    | C19orf66    | Hs.655613  | 2.05 | 1.3E-02 | chr19p13.2           |
| eukaryotic translation initiation factor 2-alpha kinase 2              | EIF2AK2     | Hs.131431  | 2.05 | 1.7E-02 | chr2p22-p21          |
| solute carrier family 16, member 6 (monocarboxylic acid transporter 7) | SLC16A6     | Hs.42645   | 2.04 | 4.0E-02 | chr17q24.2           |
| protein tyrosine phosphatase, non-receptor type 12                     | PTPN12      | Hs.61812   | 2.04 | 1.4E-02 | chr7q11.23           |
| pyruvate dehydrogenase kinase, isozyme 1                               | PDK1        | Hs.470633  | 2.04 | 3.9E-03 | chr2q31.1            |
| RNA binding motif protein 47                                           | RBM47       | Hs.518727  | 2.04 | 1.7E-02 | chr4p13-p12          |
| Teashirt zinc finger homeobox 2                                        | TSHZ2       | Hs.649877  | 2.03 | 2.9E-02 | chr20q13.2           |
| glycerol kinase 3 pseudogene                                           | GK3P        | Hs.654557  | 2.03 | 4.6E-02 | chr4q32.1            |
| leucine rich repeat neuronal 3                                         | LRRN3       | Hs.3781    | 2.03 | 4.6E-03 | chr7q31.1            |
| 229242_at                                                              |             | Hs.23349   | 2.03 | 1.8E-02 |                      |
| TAP binding protein (tapasin)                                          | TAPBP       | Hs.714746  | 2.03 | 5.1E-03 | chr6p21.3            |
| glycogen synthase 1 (muscle)                                           | GYS1        | Hs.386225  | 2.02 | 5.1E-03 | chr19q13.3           |
| solute carrier family 16, member 4 (monocarboxylic acid transporter 5) | SLC16A4     | Hs.351306  | 2.02 | 1.2E-02 | chr1p13.3            |
| guanylate binding protein 2, interferon-inducible                      | GBP2        | Hs.386567  | 2.02 | 2.5E-03 | chr1p22.2            |
| spondin 1, extracellular matrix protein                                | SPON1       | Hs.705394  | 2.01 | 4.0E-02 | chr11p15.2           |
| N-myc (and STAT) interactor                                            | NMI         | Hs.54483   | 2.01 | 6.2E-03 | chr2q23              |
| FYVE, RhoGEF and PH domain containing 4                                | FGD4        | Hs.117835  | 2.01 | 1.1E-02 | chr12p11.21          |
| ubiquitin-like modifier activating enzyme 7                            | UBA7        | Hs.16695   | 2.01 | 4.4E-03 | chr3p21              |
| mixed lineage kinase domain-like                                       | MLKL        | Hs.119878  | 2.00 | 5.2E-03 | chr16q22.3           |
| guanylate binding protein 4                                            | GBP4        | Hs.409925  | 2.00 | 1.3E-02 | chr1p22.2            |
| lanosterol synthase (2,3-oxidosqualene-lanosterol cyclase)             | LSS         | Hs.596543  | 2.00 | 2.7E-02 | chr21q22.3           |
