# Supplementary material for: Up-Regulated Expression of Extracellular Matrix Remodeling Genes in Phagocytically Challenged Trabecular Meshwork Cells
Source: PubMed Central journal article supplement (PMC3329506; doi:10.1371/journal.pone.0034792), 2012-04-18
Supplement: pone.0034792.s003.pdf [file pone.0034792.s003.pdf]

**SM-Table 2: Genes Significantly Downregulated (>2 fold, p<0.05) in HTM Cells Phagocytically Challenged to E. coli Under Physiological Conditions**

| Gene Title                                                                                | Gene Symbol | UniGene ID    | Fold | PValue  | Chromosomal Location |
|-------------------------------------------------------------------------------------------|-------------|---------------|------|---------|----------------------|
| endothelin 3                                                                              | EDN3        | Hs.1408       | 5.78 | 4.1E-03 | chr20q13.2-q13.3     |
| 228740_at                                                                                 |             | Hs.26766      | 5.73 | 4.5E-03 |                      |
| tumor necrosis factor receptor superfamily, member 10d, decoy with truncated death domain | TNFRSF10D   | Hs.213467     | 4.71 | 3.4E-03 | chr8p21              |
| Fibroblast growth factor 18                                                               | FGF18       | Hs.87191      | 4.60 | 2.9E-03 | chr5q34              |
| ceroid-lipofuscinosis, neuronal 8 (epilepsy, progressive with mental retardation)         | CLN8        | Hs.127675     | 4.24 | 3.8E-03 | chr8p23              |
| H19, imprinted maternally expressed transcript (non-protein coding)                       | H19         | Hs.533566     | 4.04 | 2.3E-03 | chr11p15.5           |
| sclerostin domain containing 1                                                            | SOSTDC1     | Hs.648106     | 4.02 | 7.8E-03 | chr7p21.1            |
| AF4/FMR2 family, member 3                                                                 | AFF3        | Hs.444414     | 3.98 | 1.1E-02 | chr2q11.2-q12        |
| C1q and tumor necrosis factor related protein 7                                           | C1QTNF7     | Hs.153714     | 3.57 | 6.5E-03 | chr4p16-p15          |
| nanos homolog 1 (Drosophila)                                                              | NANOS1      | Hs.591918     | 3.41 | 6.9E-03 | chr10q26.11          |
| ribosomal protein L27a                                                                    | RPL27A      | Hs.523463     | 3.25 | 1.7E-02 | chr11p15             |
| EPH receptor A3                                                                           | EPHA3       | Hs.123642     | 3.07 | 5.1E-03 | chr3p11.2            |
| aquaporin 1 (Colton blood group)                                                          | AQP1        | Hs.76152      | 3.07 | 2.9E-02 | chr7p14              |
| RAB39B, member RAS oncogene family                                                        | RAB39B      | Hs.632832     | 3.02 | 1.0E-02 | chrXq28              |
| G protein-coupled receptor 37 (endothelin receptor type B-like)                           | GPR37       | Hs.406094     | 2.99 | 1.3E-02 | chr7q31              |
| 238919_at                                                                                 |             | Hs.656886     | 2.98 | 2.2E-02 |                      |
| interleukin 17 receptor D                                                                 | IL17RD      | Hs.150725     | 2.97 | 2.1E-02 | chr3p14.3            |
| solute carrier family 16, member 9 (monocarboxylic acid transporter 9)                    | SLC16A9     | Hs.499709     | 2.97 | 2.1E-03 | chr10q21.1           |
| odd-skipped related 2 (Drosophila)                                                        | OSR2        | Hs.253247     | 2.89 | 3.9E-03 | chr8q22.2            |
| family with sequence similarity 13, member C                                              | FAM13C      | Hs.607594     | 2.88 | 7.2E-03 | chr10q21.1           |
| family with sequence similarity 172, member A                                             | FAM172A     | Hs.600086     | 2.84 | 6.8E-03 | chr5q15              |
| 229544_at                                                                                 |             | Hs.167087 /// | 2.73 | 2.5E-03 |                      |
| chromosome 7 open reading frame 41                                                        | C7orf41     | Hs.200100     | 2.69 | 5.2E-03 | chr7p15.1            |
| zinc finger CCCH-type, antiviral 1                                                        | ZC3HAV1     | Hs.133512     | 2.66 | 6.0E-03 | chr7q34              |
| nuclear transcription factor Y, alpha                                                     | NFYA        | Hs.10441      | 2.62 | 2.6E-02 | chr6p21.3            |
| chromodomain helicase DNA binding protein 2                                               | CHD2        | Hs.220864     | 2.62 | 1.7E-02 | chr15q26             |
| myosin VB                                                                                 | MYO5B       | Hs.200136     | 2.62 | 1.2E-02 | chr18q21             |
| 225725_at                                                                                 |             | Hs.371609     | 2.60 | 6.7E-03 |                      |
| 228120_at                                                                                 |             | Hs.656677     | 2.56 | 8.5E-03 |                      |
| hydroxysteroid (17-beta) dehydrogenase 6 homolog (mouse)                                  | HSD17B6     | Hs.524513     | 2.52 | 1.3E-02 | chr12q13             |

**SM-Table 2: Genes Significantly Downregulated (>2 fold, p<0.05) in HTM Cells Phagocytically Challenged to E. coli Under Physiological Conditions**

| Gene Title                                                                | Gene Symbol | UniGene ID | Fold | PValue  | Chromosomal Location |
|---------------------------------------------------------------------------|-------------|------------|------|---------|----------------------|
| collagen, type XI, alpha 1                                                | COL11A1     | Hs.523446  | 2.51 | 1.0E-02 | chr1p21              |
| sodium channel, voltage-gated, type II, alpha subunit                     | SCN2A       | Hs.93485   | 2.50 | 8.4E-03 | chr2q23-q24          |
| 5'-nucleotidase domain containing 2                                       | NT5DC2      | Hs.84753   | 2.46 | 7.6E-03 | chr3p21.1            |
| 235355_at                                                                 |             | Hs.609017  | 2.45 | 7.8E-03 |                      |
| fibrillin 2                                                               | FBN2        | Hs.519294  | 2.44 | 1.9E-02 | chr5q23-q31          |
| aldehyde dehydrogenase 1 family, member A1                                | ALDH1A1     | Hs.76392   | 2.44 | 3.6E-02 | chr9q21.13           |
| scinderin                                                                 | SCIN        | Hs.655515  | 2.43 | 1.1E-02 | chr7p21.3            |
| protein phosphatase 1E (PP2C domain containing)                           | PPM1E       | Hs.245044  | 2.39 | 9.1E-03 | chr17q22             |
| vasohibin 2                                                               | VASH2       | Hs.96885   | 2.35 | 1.0E-02 | chr1q32.3            |
| 229004_at                                                                 |             | Hs.534221  | 2.34 | 4.2E-03 |                      |
| endomucin                                                                 | EMCN        | Hs.152913  | 2.33 | 1.4E-02 | chr4q23              |
| 229569_at                                                                 |             | Hs.49329   | 2.32 | 2.7E-03 |                      |
| ankyrin repeat domain 6                                                   | ANKRD6      | Hs.702213  | 2.32 | 2.7E-03 | chr6q14.2-q16.1      |
| ribosomal protein S20                                                     | RPS20       | Hs.8102    | 2.31 | 1.1E-02 | chr8q12              |
| 240747_at                                                                 |             | Hs.667630  | 2.30 | 3.4E-03 |                      |
| metallophosphoesterase domain containing 2                                | MPPED2      | Hs.289795  | 2.29 | 2.3E-02 | chr11p13             |
| 241560_at                                                                 |             | Hs.164225  | 2.28 | 1.3E-02 |                      |
| ArfGAP with RhoGAP domain, ankyrin repeat and PH domain 2                 | ARAP2       | Hs.479451  | 2.27 | 1.1E-02 | chr4p14              |
| 213675_at                                                                 |             | Hs.432914  | 2.27 | 4.6E-03 |                      |
| cyclin-dependent kinase inhibitor 1C (p57, Kip2)                          | CDKN1C      | Hs.106070  | 2.27 | 4.8E-03 | chr11p15.5           |
| melanocortin 2 receptor accessory protein 2                               | MRAP2       | Hs.370055  | 2.27 | 5.4E-03 | chr6q14.3            |
| potassium voltage-gated channel, delayed-rectifier, subfamily S, member 2 | KCNS2       | Hs.388045  | 2.25 | 1.0E-02 | chr8q22              |
| protease, serine, 35                                                      | PRSS35      | Hs.98381   | 2.25 | 2.1E-03 | chr6q14.2            |
| 242899_at                                                                 |             | Hs.120633  | 2.24 | 3.1E-02 |                      |
| transmembrane protein 37                                                  | TMEM37      | Hs.26216   | 2.24 | 2.9E-02 | chr2q14.2            |
| autism susceptibility candidate 2                                         | AUTS2       | Hs.654801  | 2.23 | 3.4E-03 | chr7q11.22           |
| growth hormone receptor                                                   | GHR         | Hs.125180  | 2.22 | 7.8E-03 | chr5p13-p12          |
| WAP four-disulfide core domain 1                                          | WFDC1       | Hs.36688   | 2.22 | 2.2E-03 | chr16q24.3           |
| zinc finger, matrin type 3                                                | ZMAT3       | Hs.386299  | 2.22 | 4.7E-03 | chr3q26.3-q27        |
| protocadherin beta 6                                                      | PCDHB6      | Hs.283085  | 2.21 | 3.6E-02 | chr5q31              |
| septin 11                                                                 | SEPT11      | Hs.128199  | 2.21 | 3.2E-02 | chr4q21.1            |
| KIAA0114                                                                  | KIAA0114    | Hs.17719   | 2.20 | 3.0E-03 | chr4q12              |
| RALBP1 associated Eps domain containing 2                                 | REPS2       | Hs.186810  | 2.19 | 1.5E-02 | chrXp22.2            |

**SM-Table 2: Genes Significantly Downregulated (>2 fold, p<0.05) in HTM Cells Phagocytically Challenged to E. coli Under Physiological Conditions**

| Gene Title                                                                       | Gene Symbol | UniGene ID | Fold | PValue  | Chromosomal Location |
|----------------------------------------------------------------------------------|-------------|------------|------|---------|----------------------|
| glutaminase                                                                      | GLS         | Hs.116448  | 2.19 | 6.0E-03 | chr2q32-q34          |
| doublecortin-like kinase 1                                                       | DCLK1       | Hs.507755  | 2.19 | 3.1E-02 | chr13q13             |
| 237400_at                                                                        |             | Hs.656689  | 2.19 | 3.9E-03 |                      |
| matrix metalloproteinase 16 (membrane-inserted)                                  | MMP16       | Hs.546267  | 2.19 | 1.4E-02 | chr8q21.3            |
| Tetraspanin 18                                                                   | TSPAN18     | Hs.385634  | 2.19 | 3.4E-03 | chr11p11.2           |
| jagged 1 (Alagille syndrome)                                                     | JAG1        | Hs.714736  | 2.18 | 2.4E-02 | chr20p12.1-p11.23    |
| selenoprotein P, plasma, 1                                                       | SEPP1       | Hs.275775  | 2.18 | 1.3E-02 | chr5q31              |
| osteoglycin                                                                      | OGN         | Hs.109439  | 2.18 | 2.6E-03 | chr9q22              |
| 215306_at                                                                        |             | Hs.660870  | 2.17 | 4.1E-03 |                      |
| 229072_at                                                                        |             | Hs.594773  | 2.16 | 1.2E-02 |                      |
| SLIT and NTRK-like family, member 6                                              | SLITRK6     | Hs.525105  | 2.16 | 7.8E-03 | chr13q31.1           |
| hypothetical LOC730101                                                           | LOC730101   | Hs.7921    | 2.15 | 1.2E-02 | chr6p12.1            |
| ring finger protein 144A                                                         | RNF144A     | Hs.22146   | 2.15 | 3.4E-03 | chr2p25.2-p25.1      |
| transmembrane protein 119                                                        | TMEM119     | Hs.449718  | 2.14 | 4.0E-03 | chr12q24.11          |
| small nuclear ribonucleoprotein polypeptide N                                    | SNRPN       | Hs.592473  | 2.14 | 4.1E-02 | chr15q11.2           |
| aldehyde dehydrogenase 5 family, member A1                                       | ALDH5A1     | Hs.371723  | 2.14 | 1.3E-02 | chr6p22.2-p22.3      |
| osteomodulin                                                                     | OMD         | Hs.94070   | 2.13 | 5.2E-03 | chr9q22.31           |
| sema domain, transmembrane domain (TM), and cytoplasmic domain, (semaphorin) 6A  | SEMA6A      | Hs.156967  | 2.13 | 2.3E-02 | chr5q23.1            |
| sodium leak channel, non-selective                                               | NALCN       | Hs.525146  | 2.13 | 2.8E-02 | chr13q32.3           |
| snail homolog 2 (Drosophila)                                                     | SNAI2       | Hs.360174  | 2.12 | 2.6E-03 | chr8q11              |
| TAF9B RNA polymerase II, TATA box binding protein (TBP)-associated factor, 31kDa | TAF9B       | Hs.592248  | 2.11 | 2.5E-02 | chrXq13.1-q21.1      |
| matrix Gla protein                                                               | MGP         | Hs.365706  | 2.11 | 4.0E-02 | chr12p13.1-p12.3     |
| family with sequence similarity 129, member A                                    | FAM129A     | Hs.518662  | 2.10 | 2.9E-02 | chr1q25              |
| sarcoglycan, gamma (35kDa dystrophin-associated glycoprotein)                    | SGCG        | Hs.37167   | 2.09 | 2.9E-03 | chr13q12             |
| 1557275_a_at                                                                     |             | Hs.547494  | 2.09 | 3.7E-02 |                      |
| ankyrin repeat domain 50                                                         | ANKRD50     | Hs.480694  | 2.09 | 1.9E-02 | chr4q28.1            |
| 236297_at                                                                        |             | Hs.585479  | 2.08 | 3.2E-03 |                      |
| phospholipase C, epsilon 1                                                       | PLCE1       | Hs.655033  | 2.08 | 1.7E-02 | chr10q23             |
| leucine-rich, glioma inactivated 1                                               | LGI1        | Hs.533670  | 2.08 | 1.2E-02 | chr10q24             |
| corin, serine peptidase                                                          | CORIN       | Hs.518618  | 2.07 | 4.0E-03 | chr4p13-p12          |
| 229823_at                                                                        |             | Hs.709812  | 2.07 | 2.6E-02 |                      |
| Ras association (RalGDS/AF-6) domain family member 2                             | RASSF2      | Hs.631504  | 2.06 | 3.7E-03 | chr20pter-p12.1      |

**SM-Table 2: Genes Significantly Downregulated (>2 fold, p<0.05) in HTM Cells Phagocytically Challenged to E. coli Under Physiological Conditions**

| Gene Title                                                                                | Gene Symbol | UniGene ID | Fold | PValue  | Chromosomal Location |
|-------------------------------------------------------------------------------------------|-------------|------------|------|---------|----------------------|
| transmembrane and coiled-coil domain family 3                                             | TMCC3       | Hs.370410  | 2.06 | 2.3E-02 | chr12q22             |
| synaptopodin 2                                                                            | SYNPO2      | Hs.655519  | 2.04 | 1.7E-02 | chr4q26              |
| family with sequence similarity 149, member A                                             | FAM149A     | Hs.357025  | 2.01 | 8.6E-03 | chr4q35.2            |
| collagen, type VIII, alpha 2                                                              | COL8A2      | Hs.353001  | 2.00 | 6.2E-03 | chr1p34.2            |
| B-cell CLL/lymphoma 11A (zinc finger protein)                                             | BCL11A      | Hs.370549  | 2.00 | 1.1E-02 | chr2p16.1            |
| retinol binding protein 1, cellular                                                       | RBP1        | Hs.529571  | 2.00 | 3.5E-03 | chr3q23              |
| potassium intermediate/small conductance calcium-activated channel, subfamily N, member 2 | KCNN2       | Hs.98280   | 2.00 | 2.8E-02 | chr5q22.3            |
