# Supplementary material for: Up-Regulated Expression of Extracellular Matrix Remodeling Genes in Phagocytically Challenged Trabecular Meshwork Cells
Source: PubMed Central journal article supplement (PMC3329506; doi:10.1371/journal.pone.0034792), 2012-04-18
Supplement: pone.0034792.s004.pdf [file pone.0034792.s004.pdf]

**SM-Table 3: Genes Significantly Upregulated (>1.5 fold, p<0.05) in HTM Cells Phagocytically Challenged to Pigment Under Physiological Conditions**

| Gene Title                                                                              | Gene Symbol | UniGene ID | Fold | PValue  | Chromosomal Location |
|-----------------------------------------------------------------------------------------|-------------|------------|------|---------|----------------------|
| interleukin 33                                                                          | IL33        | Hs.348390  | 2.16 | 4.3E-03 | chr9p24.1            |
| matrix metalloproteinase 3 (stromelysin 1, progelatinase)                               | MMP3        | Hs.375129  | 2.09 | 6.0E-03 | chr11q22.3           |
| matrix metalloproteinase 1 (interstitial collagenase)                                   | MMP1        | Hs.83169   | 1.98 | 5.9E-03 | chr11q22.3           |
| deiodinase, iodothyronine, type II                                                      | DIO2        | Hs.202354  | 1.92 | 6.0E-03 | chr14q24.2-q24.3     |
| tumor necrosis factor (ligand) superfamily, member 11                                   | TNFSF11     | Hs.333791  | 1.87 | 9.1E-03 | chr13q14             |
| tissue factor pathway inhibitor 2                                                       | TFPI2       | Hs.438231  | 1.81 | 1.2E-02 | chr7q22              |
| 230746_s_at                                                                             |             | Hs.713064  | 1.80 | 2.8E-03 |                      |
| kynureninase (L-kynurenine hydrolase)                                                   | KYNU        | Hs.470126  | 1.75 | 1.3E-02 | chr2q22.2            |
| Growth arrest-specific 2 like 3                                                         | GAS2L3      | Hs.20575   | 1.63 | 2.5E-02 | chr12q23.1           |
| discs, large (Drosophila) homolog-associated protein 5                                  | DLGAP5      | Hs.77695   | 1.62 | 1.3E-02 | chr14q22.3           |
| cyclin B1                                                                               | CCNB1       | Hs.23960   | 1.61 | 2.1E-02 | chr5q12              |
| centromere protein A                                                                    | CENPA       | Hs.1594    | 1.59 | 2.1E-02 | chr2p24-p21          |
| kinesin family member 20A                                                               | KIF20A      | Hs.718626  | 1.59 | 1.9E-02 | chr5q31              |
| forkhead box Q1                                                                         | FOXQ1       | Hs.591352  | 1.59 | 2.8E-02 | chr6p25              |
| UDP-N-acetyl-alpha-D-galactosamine:polypeptide N-acetylgalactosaminyltransferase-like 2 | GALNTL2     | Hs.411308  | 1.59 | 2.2E-02 | chr3p24.3            |
| superoxide dismutase 2, mitochondrial                                                   | SOD2        | Hs.487046  | 1.56 | 6.0E-03 | chr6q25.3            |
| NIMA (never in mitosis gene a)-related kinase 2                                         | NEK2        | Hs.153704  | 1.56 | 9.2E-03 | chr1q32.2-q41        |
| six transmembrane epithelial antigen of the prostate 1                                  | STEAP1      | Hs.61635   | 1.53 | 5.3E-03 | chr7q21              |
| hyaluronan-mediated motility receptor (RHAMM)                                           | HMMR        | Hs.72550   | 1.52 | 4.3E-02 | chr5q33.2-qter       |
| family with sequence similarity 83, member D                                            | FAM83D      | Hs.472716  | 1.52 | 1.7E-02 | chr20q11.22-q12      |
| chemokine (C-X-C motif) ligand 6 (granulocyte chemotactic protein 2)                    | CXCL6       | Hs.164021  | 1.51 | 1.4E-02 | chr4q21              |
| stanniocalcin 1                                                                         | STC1        | Hs.25590   | 1.51 | 2.8E-03 | chr8p21-p11.2        |
| solute carrier family 39 (zinc transporter), member 8                                   | SLC39A8     | Hs.288034  | 1.51 | 8.0E-03 | chr4q22-q24          |
| coxsackie virus and adenovirus receptor                                                 | CXADR       | Hs.634837  | 1.51 | 1.9E-02 | chr21q21.1           |
| SPC25, NDC80 kinetochore complex component, homolog (S. cerevisiae)                     | SPC25       | Hs.421956  | 1.50 | 1.5E-02 | chr2q24.3            |
| TTK protein kinase                                                                      | TTK         | Hs.169840  | 1.50 | 2.1E-02 | chr6q13-q21          |
