# Supplementary material for: Up-Regulated Expression of Extracellular Matrix Remodeling Genes in Phagocytically Challenged Trabecular Meshwork Cells
Source: PubMed Central journal article supplement (PMC3329506; doi:10.1371/journal.pone.0034792), 2012-04-18
Supplement: pone.0034792.s005.pdf [file pone.0034792.s005.pdf]

**SM-Table 4: Genes Significantly Downregulated (>1.5 fold, p<0.05) in HTM Cells Phagocytically Challenged to Pigment Under Physiological Conditions**

| Gene Title                                                          | Gene Symbol | UniGene ID | Fold | PValue  | Chromosomal Location |
|---------------------------------------------------------------------|-------------|------------|------|---------|----------------------|
| ankyrin repeat domain 6                                             | ANKRD6      | Hs.702213  | 1.82 | 2.7E-02 | chr6q14.2-q16.1      |
| Tetraspanin 18                                                      | TSPAN18     | Hs.385634  | 1.77 | 6.0E-03 | chr11p11.2           |
| tetraspanin 2                                                       | TSPAN2      | Hs.310458  | 1.71 | 2.2E-02 | chr1p13.2            |
| 244826_at                                                           |             | Hs.653282  | 1.69 | 2.9E-02 |                      |
| lysosomal-associated membrane protein 3                             | LAMP3       | Hs.518448  | 1.66 | 8.9E-03 | chr3q26.3-q27        |
| H19, imprinted maternally expressed transcript (non-protein coding) | H19         | Hs.533566  | 1.63 | 5.9E-03 | chr11p15.5           |
| oxytocin receptor                                                   | OXTR        | Hs.2820    | 1.63 | 3.1E-02 | chr3p25              |
| 229795_at                                                           |             | Hs.48945   | 1.62 | 1.0E-02 |                      |
| fibroblast growth factor receptor 3                                 | FGFR3       | Hs.1420    | 1.61 | 1.9E-02 | chr4p16.3            |
| WAP four-disulfide core domain 1                                    | WFDC1       | Hs.36688   | 1.58 | 4.3E-03 | chr16q24.3           |
| growth arrest-specific 5 (non-protein coding)                       | GAS5        | Hs.656411  | 1.53 | 3.8E-02 | chr1q25.1            |
| ArfGAP with RhoGAP domain, ankyrin repeat and PH domain 2           | ARAP2       | Hs.479451  | 1.52 | 2.0E-02 | chr4p14              |
| hydroxysteroid (17-beta) dehydrogenase 6 homolog (mouse)            | HSD17B6     | Hs.524513  | 1.51 | 2.3E-02 | chr12q13             |
| aquaporin 1 (Colton blood group)                                    | AQP1        | Hs.76152   | 1.51 | 1.2E-02 | chr7p14              |
