# Supplementary material for: Up-Regulated Expression of Extracellular Matrix Remodeling Genes in Phagocytically Challenged Trabecular Meshwork Cells
Source: PubMed Central journal article supplement (PMC3329506; doi:10.1371/journal.pone.0034792), 2012-04-18
Supplement: pone.0034792.s006.pdf [file pone.0034792.s006.pdf]

**SM-Table 5: Summary of the Expression Level and pValues Obtained by qPCR**

|                    |                | Control            |              | E. coli            |             |             | Pigment            |             |            |        |
|--------------------|----------------|--------------------|--------------|--------------------|-------------|-------------|--------------------|-------------|------------|--------|
|                    |                | 2 <sup>-</sup> DCt | (#) pValue   | 2 <sup>-</sup> DCt | (*) pValue  | (#) pValue  | 2 <sup>-</sup> DCt | (*) pValue  | (#) pValue |        |
| 5% O <sub>2</sub>  | Human          | <i>MMP1</i>        | 1.96±0.029   | 14.37±0.034        | <0.0001     |             | 5.05±0.018         | <0.0001     |            |        |
|                    |                | <i>MMP3</i>        | 0.163±0.019  | 1.483±0.002        | <0.0001     |             | 0.419±0.001        | <0.0001     |            |        |
|                    |                | <i>TFPI2</i>       | 0.099±0.02   | 0.657±0.082        | 0.0003      |             | 0.2±0.042          | 0.0198      |            |        |
|                    |                | <i>LAMC2</i>       | 0.149±0.03   | 0.189±0.031        | >0.05       |             | 0.177±0.03         | >0.05       |            |        |
|                    |                | <i>TNFSF11</i>     | 0.078±0.03   | 0.137±0.072        | 0.048       |             | 0.15±0.012         | 0.0182      |            |        |
|                    |                | <i>EDN3</i>        | 0.471±0.091  | 0.044±0.007        | 0.0013      |             | 0.351±0.054        | >0.05       |            |        |
| Porcine            | <i>MMP1</i>    | 2.32±1.105         | 304.5±79.185 | <0.0001            |             | 12.31±1.84  | <0.0001            |             |            |        |
|                    | <i>MMP3</i>    | 0.029±0.015        | 52.305±5.034 | <0.0001            |             | 0.073±0.001 | 0.007              |             |            |        |
|                    | <i>TNFSF11</i> | 0.087±0.03         | 0.222±0.039  | 0.009              |             | 0.032±0.004 | 0.0346             |             |            |        |
| 40% O <sub>2</sub> | Human          | <i>MMP1</i>        | 1.948±0.003  | >0.05              | 7.514±0.331 | <0.0001     | <0.0001            | 3.982±0.254 | >0.05      | 0.0019 |
|                    |                | <i>MMP3</i>        | 0.257±0.045  | >0.05              | 1.375±0.018 | <0.0001     | >0.05              | 0.376±0.338 | 0.0002     | >0.05  |
|                    |                | <i>TFPI2</i>       | 0.188±0.125  | >0.05              | 0.859±0.057 | 0.0011      | 0.0248             | 0.212±0.013 | >0.05      | >0.05  |
|                    |                | <i>LAMC2</i>       | 0.08±0.006   | 0.0174             | 0.123±0.018 | 0.0172      | 0.0332             | 0.19±0.042  | >0.05      | >0.05  |
|                    |                | <i>TNFSF11</i>     | 0.035±0.003  | >0.05              | 0.06±0.002  | 0.0003      | >0.05              | 0.067±0.002 | 0.0001     | 0.0003 |
|                    |                | <i>EDN3</i>        | 0.091±0.068  | 0.0237             | 0.007±0.005 | 0.0065      | >0.05              | 0.054±0.01  | >0.05      | 0.0073 |
| Porcine            | <i>MMP1</i>    | 21.440±5.778       | <0.0001      | 316.204±34         | <0.0001     | >0.05       | 35.711±3.959       | 0.0243      | 0.0007     |        |
|                    | <i>MMP3</i>    | 0.065±0.006        | 0.0182       | 50.436±16.739      | <0.0001     | >0.05       | 0.156±0.068        | >0.05       | >0.05      |        |
|                    | <i>TNFSF11</i> | 0.02±0.007         | 0.0197       | 0.619±0.168        | 0.0035      | 0.0163      | 0.009±0.002        | >0.05       | 0.0009     |        |
