# Supplementary material for: Up-Regulated Expression of Extracellular Matrix Remodeling Genes in Phagocytically Challenged Trabecular Meshwork Cells
Source: PubMed Central journal article supplement (PMC3329506; doi:10.1371/journal.pone.0034792), 2012-04-18
Supplement: pone.0034792.s007.pdf [file pone.0034792.s007.pdf]

**SM-Table 6: Genes Significantly Upregulated (>2 fold, p<0.05) in HTM Cells Phagocytically Challenged to E. coli Under Oxidative Stress Conditions**

| Gene Title                                                                         | Gene Symbol | UniGene ID | Fold  | PValue   | Chromosomal Location |
|------------------------------------------------------------------------------------|-------------|------------|-------|----------|----------------------|
| chemokine (C-X-C motif) ligand 11                                                  | CXCL11      | Hs.632592  | 98.99 | 4.86E-07 | chr4q21.2            |
| chemokine (C-X-C motif) ligand 5                                                   | CXCL5       | Hs.89714   | 67.17 | 1.93E-06 | chr4q12-q13          |
| myxovirus (influenza virus) resistance 1, interferon-inducible protein p78 (mouse) | MX1         | Hs.517307  | 59.26 | 1.70E-06 | chr21q22.3           |
| interferon-induced protein 44-like                                                 | IFI44L      | Hs.389724  | 50.42 | 1.48E-06 | chr1p31.1            |
| chemokine (C-X-C motif) ligand 2                                                   | CXCL2       | Hs.75765   | 46.84 | 1.48E-06 | chr4q21              |
| chemokine (C-X-C motif) ligand 3                                                   | CXCL3       | Hs.89690   | 41.74 | 2.15E-06 | chr4q21              |
| interferon, alpha-inducible protein 27                                             | IFI27       | Hs.532634  | 33.35 | 2.50E-06 | chr14q32             |
| radical S-adenosyl methionine domain containing 2                                  | RSAD2       | Hs.17518   | 30.30 | 2.21E-06 | chr2p25.2            |
| 2',5'-oligoadenylate synthetase 1, 40/46kDa                                        | OAS1        | Hs.524760  | 30.05 | 4.78E-06 | chr12q24.1           |
| ISG15 ubiquitin-like modifier                                                      | ISG15       | Hs.458485  | 28.82 | 1.08E-06 | chr1p36.33           |
| chemokine (C-C motif) ligand 8                                                     | CCL8        | Hs.271387  | 26.82 | 7.28E-06 | chr17q11.2           |
| 2'-5'-oligoadenylate synthetase 2, 69/71kDa                                        | OAS2        | Hs.414332  | 20.48 | 1.79E-06 | chr12q24.2           |
| cytidine monophosphate (UMP-CMP) kinase 2, mitochondrial                           | CMPK2       | Hs.7155    | 19.80 | 5.48E-06 | chr2p25.2            |
| chemokine (C-X-C motif) ligand 1 (melanoma growth stimulating activity, alpha)     | CXCL1       | Hs.789     | 19.67 | 3.43E-06 | chr4q21              |
| superoxide dismutase 2, mitochondrial                                              | SOD2        | Hs.487046  | 18.82 | 3.81E-06 | chr6q25.3            |
| hect domain and RLD 6                                                              | HERC6       | Hs.529317  | 18.63 | 1.48E-06 | chr4q22.1            |
| chemokine (C-C motif) ligand 2                                                     | CCL2        | Hs.303649  | 18.60 | 4.76E-06 | chr17q11.2-q12       |
| bone marrow stromal cell antigen 2                                                 | BST2        | Hs.118110  | 17.23 | 4.86E-07 | chr19p13.2           |
| interleukin 6 (interferon, beta 2)                                                 | IL6         | Hs.654458  | 16.41 | 1.48E-06 | chr7p21              |
| chemokine (C-C motif) ligand 7                                                     | CCL7        | Hs.251526  | 16.12 | 1.65E-06 | chr17q11.2-q12       |
| interferon, alpha-inducible protein 6                                              | IFI6        | Hs.523847  | 15.14 | 5.05E-06 | chr1p35              |
| chromosome 15 open reading frame 48                                                | C15orf48    | Hs.112242  | 15.02 | 7.04E-06 | chr15q21.1           |
| chemokine (C-C motif) ligand 20                                                    | CCL20       | Hs.75498   | 13.97 | 7.28E-06 | chr2q33-q37          |
| tumor necrosis factor, alpha-induced protein 3                                     | TNFAIP3     | Hs.211600  | 12.67 | 1.48E-06 | chr6q23              |
| cathepsin S                                                                        | CTSS        | Hs.181301  | 12.52 | 8.40E-06 | chr1q21              |
| interleukin 33                                                                     | IL33        | Hs.348390  | 12.23 | 7.04E-06 | chr9p24.1            |
| myxovirus (influenza virus) resistance 2 (mouse)                                   | MX2         | Hs.926     | 11.66 | 4.59E-06 | chr21q22.3           |
| nuclear factor of kappa light polypeptide gene enhancer in B-cells inhibitor, zeta | NFKBIZ      | Hs.319171  | 11.40 | 1.30E-05 | chr3p12-q12          |
| interferon-induced protein with tetratricopeptide repeats 3                        | IFIT3       | Hs.714337  | 11.34 | 1.86E-06 | chr10q24             |
| interferon-induced protein with tetratricopeptide repeats 1                        | IFIT1       | Hs.20315   | 11.16 | 1.70E-06 | chr10q25-q26         |
| complement component 2 /// complement factor B                                     | C2 /// CFB  | Hs.408903  | 11.09 | 1.65E-06 | chr6p21.3            |
| interferon induced with helicase C domain 1                                        | IFIH1       | Hs.163173  | 10.68 | 1.48E-06 | chr2q24              |

**SM-Table 6: Genes Significantly Upregulated (>2 fold, p<0.05) in HTM Cells Phagocytically Challenged to E. coli Under Oxidative Stress Conditions**

| Gene Title                                                           | Gene Symbol | UniGene ID | Fold  | PValue   | Chromosomal Location |
|----------------------------------------------------------------------|-------------|------------|-------|----------|----------------------|
| interleukin 8                                                        | IL8         | Hs.624     | 10.06 | 2.13E-05 | chr4q13-q21          |
| solute carrier family 39 (zinc transporter), member 8                | SLC39A8     | Hs.288034  | 9.79  | 7.28E-06 | chr4q22-q24          |
| complement component 3                                               | C3          | Hs.529053  | 9.44  | 2.38E-05 | chr19p13.3-p13.2     |
| matrix metalloproteinase 12 (macrophage elastase)                    | MMP12       | Hs.1695    | 9.41  | 1.65E-06 | chr11q22.3           |
| Ets homologous factor                                                | EHF         | Hs.653859  | 8.50  | 1.48E-06 | chr11p12             |
| chemokine (C-X-C motif) ligand 6 (granulocyte chemotactic protein 2) | CXCL6       | Hs.164021  | 8.38  | 3.58E-05 | chr4q21              |
| tissue factor pathway inhibitor 2                                    | TFPI2       | Hs.438231  | 8.17  | 2.39E-05 | chr7q22              |
| mitogen-activated protein kinase kinase kinase 8                     | MAP3K8      | Hs.432453  | 8.01  | 3.20E-05 | chr10p11.23          |
|                                                                      |             | Hs.660221  | 7.86  | 1.26E-06 |                      |
|                                                                      |             | Hs.713064  | 7.66  | 6.83E-07 |                      |
| stanniocalcin 1                                                      | STC1        | Hs.25590   | 7.54  | 1.82E-06 | chr8p21-p11.2        |
| intercellular adhesion molecule 1                                    | ICAM1       | Hs.643447  | 7.36  | 4.35E-05 | chr19p13.3-p13.2     |
| 2'-5'-oligoadenylate synthetase 3, 100kDa                            | OAS3        | Hs.528634  | 7.31  | 1.17E-05 | chr12q24.2           |
| serpin peptidase inhibitor, clade B (ovalbumin), member 2            | SERPINB2    | Hs.594481  | 7.30  | 7.58E-06 | chr18q21.3           |
| tryptophan 2,3-dioxygenase                                           | TDO2        | Hs.183671  | 7.25  | 7.28E-06 | chr4q31-q32          |
| vascular cell adhesion molecule 1                                    | VCAM1       | Hs.109225  | 7.12  | 1.08E-06 | chr1p32-p31          |
| chemokine (C-X-C motif) ligand 10                                    | CXCL10      | Hs.632586  | 7.10  | 1.70E-06 | chr4q21              |
| matrix metalloproteinase 3 (stromelysin 1, progelatinase)            | MMP3        | Hs.375129  | 6.99  | 6.17E-06 | chr11q22.3           |
| baculoviral IAP repeat-containing 3                                  | BIRC3       | Hs.127799  | 6.84  | 2.80E-06 | chr11q22             |
|                                                                      |             | Hs.660221  | 6.84  | 2.15E-06 |                      |
| myocardin                                                            | MYOCD       | Hs.567641  | 6.74  | 2.10E-05 | chr17p11.2           |
|                                                                      |             | Hs.660221  | 6.36  | 1.48E-06 |                      |
| SAM domain and HD domain 1                                           | SAMHD1      | Hs.580681  | 6.25  | 2.00E-05 | chr20pter-q12        |
| XIAP associated factor 1                                             | XAF1        | Hs.441975  | 5.98  | 1.70E-06 | chr17p13.2           |
| hydroxysteroid (11-beta) dehydrogenase 1                             | HSD11B1     | Hs.195040  | 5.89  | 1.48E-06 | chr1q32-q41          |
|                                                                      |             | Hs.657330  | 5.66  | 1.13E-03 |                      |
| tumor necrosis factor, alpha-induced protein 6                       | TNFAIP6     | Hs.437322  | 5.56  | 4.25E-07 | chr2q23.3            |
| transient receptor potential cation channel, subfamily A, member 1   | TRPA1       | Hs.716816  | 5.48  | 2.97E-06 | chr8q13              |
| interleukin-1 receptor-associated kinase 2                           | IRAK2       | Hs.449207  | 5.33  | 1.69E-05 | chr3p25.3            |
| six transmembrane epithelial antigen of the prostate 1               | STEAP1      | Hs.61635   | 5.33  | 2.51E-06 | chr7q21              |
| GTP cyclohydrolase 1                                                 | GCH1        | Hs.86724   | 5.30  | 3.73E-06 | chr14q22.1-q22.2     |
| hypothetical protein LOC387763                                       | LOC387763   | Hs.714890  | 5.26  | 5.10E-05 | chr11p11.2           |
| bradykinin receptor B1                                               | BDKRB1      | Hs.525572  | 5.24  | 7.28E-06 | chr14q32.1-q32.2     |

**SM-Table 6: Genes Significantly Upregulated (>2 fold, p<0.05) in HTM Cells Phagocytically Challenged to E. coli Under Oxidative Stress Conditions**

| Gene Title                                                                             | Gene Symbol | UniGene ID | Fold | PValue   | Chromosomal Location |
|----------------------------------------------------------------------------------------|-------------|------------|------|----------|----------------------|
| hect domain and RLD 5                                                                  | HERC5       | Hs.26663   | 5.21 | 8.79E-06 | chr4q22.1            |
| kynureninase (L-kynurenine hydrolase)                                                  | KYNU        | Hs.470126  | 5.12 | 3.24E-05 | chr2q22.2            |
| tripartite motif-containing 14                                                         | TRIM14      | Hs.575631  | 5.10 | 2.52E-06 | chr9q22.33           |
| chemokine (C-C motif) ligand 5                                                         | CCL5        | Hs.514821  | 5.09 | 1.28E-05 | chr17q11.2-q12       |
| metallothionein 1M                                                                     | MT1M        | Hs.647370  | 5.08 | 2.94E-05 | chr16q13             |
| XIAP associated factor 1                                                               | XAF1        | Hs.441975  | 5.05 | 2.45E-07 | chr17p13.2           |
| prostaglandin-endoperoxide synthase 2 (prostaglandin G/ H synthase and cyclooxygenase) | PTGS2       | Hs.196384  | 5.04 | 3.24E-06 | chr1q25.2-q25.3      |
| DEAD (Asp-Glu-Ala-Asp) box polypeptide 58                                              | DDX58       | Hs.190622  | 4.95 | 3.12E-05 | chr9p12              |
| nicotinamide phosphoribosyltransferase                                                 | NAMPT       | Hs.489615  | 4.73 | 5.36E-07 | chr7q22.2            |
| cholesterol 25-hydroxylase                                                             | CH25H       | Hs.47357   | 4.70 | 1.48E-06 | chr10q23             |
| tumor necrosis factor, alpha-induced protein 2                                         | TNFAIP2     | Hs.525607  | 4.57 | 2.70E-05 | chr14q32             |
| nuclear factor of kappa light polypeptide gene enhancer in B-cells inhibitor, alpha    | NFKBIA      | Hs.81328   | 4.53 | 1.48E-06 | chr14q13             |
| interferon-induced protein 44                                                          | IFI44       | Hs.82316   | 4.53 | 1.79E-06 | chr1p31.1            |
| interferon regulatory factor 7                                                         | IRF7        | Hs.166120  | 4.46 | 2.07E-06 | chr11p15.5           |
| interleukin 11                                                                         | IL11        | Hs.467304  | 4.33 | 2.00E-05 | chr19q13.3-q13.4     |
| damage-regulated autophagy modulator                                                   | DRAM        | Hs.525634  | 4.27 | 1.86E-06 | chr12q23.2           |
| interferon-induced protein with tetratricopeptide repeats 2                            | IFIT2       | Hs.437609  | 4.19 | 1.94E-05 | chr10q23-q25         |
| signal transducer and activator of transcription 1, 91kDa                              | STAT1       | Hs.715518  | 4.19 | 1.93E-06 | chr2q32.2            |
| leukemia inhibitory factor (cholinergic differentiation factor)                        | LIF         | Hs.2250    | 4.13 | 7.29E-06 | chr22q12.2           |
| interferon-induced protein 35                                                          | IFI35       | Hs.632258  | 4.07 | 2.31E-05 | chr17q21             |
| chromosome 8 open reading frame 4                                                      | C8orf4      | Hs.591849  | 4.05 | 1.48E-06 | chr8p11.2            |
| adenosine monophosphate deaminase (isoform E)                                          | AMPD3       | Hs.501890  | 3.92 | 3.71E-06 | chr11p15             |
| deiodinase, iodothyronine, type II                                                     | DIO2        | Hs.202354  | 3.82 | 1.61E-05 | chr14q24.2-q24.3     |
| Norrie disease (pseudoglioma)                                                          | NDP         | Hs.522615  | 3.81 | 7.53E-04 | chrXp11.4            |
| zinc finger CCCH-type containing 12A                                                   | ZC3H12A     | Hs.656294  | 3.77 | 7.57E-06 | chr1p34.3            |
| cingulin-like 1                                                                        | CGNL1       | Hs.148989  | 3.76 | 3.44E-04 | chr15q21.3           |
| bone morphogenetic protein 2                                                           | BMP2        | Hs.73853   | 3.75 | 7.04E-06 | chr20p12             |
| angiopoietin-like 1                                                                    | ANGPTL1     | Hs.591474  | 3.74 | 2.15E-06 | chr1q25.2            |
| tumor necrosis factor (ligand) superfamily, member 13b                                 | TNFSF13B    | Hs.525157  | 3.68 | 1.70E-06 | chr13q32-q34         |
| phospholipid scramblase 1                                                              | PLSCR1      | Hs.130759  | 3.64 | 1.57E-05 | chr3q23              |
| endothelial cell-specific molecule 1                                                   | ESM1        | Hs.129944  | 3.63 | 6.89E-03 | chr5q11.2            |
| epiregulin                                                                             | EREG        | Hs.115263  | 3.62 | 4.13E-04 | chr4q13.3            |
| ubiquitin specific peptidase 18                                                        | USP18       | Hs.38260   | 3.61 | 2.75E-05 | chr22q11.21          |

**SM-Table 6: Genes Significantly Upregulated (>2 fold, p<0.05) in HTM Cells Phagocytically Challenged to E. coli Under Oxidative Stress Conditions**

| Gene Title                                                                                | Gene Symbol | UniGene ID | Fold | PValue   | Chromosomal Location |
|-------------------------------------------------------------------------------------------|-------------|------------|------|----------|----------------------|
| matrix metalloproteinase 1 (interstitial collagenase)                                     | MMP1        | Hs.83169   | 3.60 | 3.96E-06 | chr11q22.3           |
| claudin 1                                                                                 | CLDN1       | Hs.439060  | 3.60 | 1.65E-05 | chr3q28-q29          |
| neuronal cell adhesion molecule                                                           | NRCAM       | Hs.21422   | 3.51 | 4.59E-06 | chr7q31.1-q31.2      |
| sterile alpha motif domain containing 9                                                   | SAMD9       | Hs.65641   | 3.38 | 2.13E-06 | chr7q21.2            |
| Epithelial stromal interaction 1 (breast)                                                 | EPST11      | Hs.546467  | 3.37 | 2.87E-05 | chr13q13.3           |
| retinoic acid receptor responder (tazarotene induced) 1                                   | RARRES1     | Hs.131269  | 3.35 | 3.91E-05 | chr3q25.32-q25.33    |
| interleukin-1 receptor-associated kinase 3                                                | IRAK3       | Hs.369265  | 3.27 | 1.68E-04 | chr12q14.3           |
| interleukin 32                                                                            | IL32        | Hs.943     | 3.24 | 2.45E-05 | chr16p13.3           |
| ABI family, member 3 (NESH) binding protein                                               | ABI3BP      | Hs.477015  | 3.21 | 5.18E-05 | chr3q12              |
| poly (ADP-ribose) polymerase family, member 14                                            | PARP14      | Hs.518203  | 3.14 | 1.65E-05 | chr3q21.1            |
| nuclear factor (erythroid-derived 2)-like 3                                               | NFE2L3      | Hs.404741  | 3.12 | 4.36E-05 | chr7p15-p14          |
| tumor necrosis factor (ligand) superfamily, member 11                                     | TNFSF11     | Hs.333791  | 3.11 | 1.31E-05 | chr13q14             |
| membrane-associated ring finger (C3HC4) 3                                                 | MARCH3      | Hs.132441  | 3.08 | 1.59E-05 | chr5q23.2            |
| delta/notch-like EGF repeat containing                                                    | DNER        | Hs.234074  | 3.06 | 2.04E-05 | chr2q36.3            |
| Wilms tumor 1 associated protein                                                          | WTAP        | Hs.446091  | 3.05 | 1.82E-05 | chr6q25-q27          |
| interferon induced transmembrane protein 1 (9-27)                                         | IFITM1      | Hs.458414  | 2.99 | 9.12E-06 | chr11p15.5           |
| proteasome (prosome, macropain) subunit, beta type, 9 (large multifunctional peptidase 2) | PSMB9       | Hs.654585  | 2.99 | 1.10E-04 | chr6p21.3            |
| v-maf musculoaponeurotic fibrosarcoma oncogene homolog F (avian)                          | MAFF        | Hs.517617  | 2.99 | 7.28E-06 | chr22q13.1           |
| GTP binding protein overexpressed in skeletal muscle                                      | GEM         | Hs.654463  | 2.98 | 3.20E-05 | chr8q13-q21          |
| family with sequence similarity 65, member C                                              | FAM65C      | Hs.372578  | 2.97 | 1.59E-05 | chr20q13.13          |
| sterile alpha motif domain containing 9-like                                              | SAMD9L      | Hs.489118  | 2.96 | 8.03E-06 | chr7q21.2-q21.3      |
| poly (ADP-ribose) polymerase family, member 12                                            | PARP12      | Hs.12646   | 2.90 | 4.99E-06 | chr7q34              |
| solute carrier family 11 (proton-coupled divalent metal ion transporters), member 2       | SLC11A2     | Hs.505545  | 2.87 | 1.16E-06 | chr12q13             |
|                                                                                           |             | Hs.658454  | 2.85 | 1.34E-04 |                      |
| immediate early response 3                                                                | IER3        | Hs.591785  | 2.82 | 7.70E-06 | chr6p21.3            |
| BCL2-related protein A1                                                                   | BCL2A1      | Hs.227817  | 2.82 | 1.59E-04 | chr15q24.3           |
| zinc finger CCCH-type containing 12C                                                      | ZC3H12C     | Hs.376289  | 2.81 | 9.09E-05 | chr11q22.3           |
| tripartite motif-containing 14                                                            | TRIM14      | Hs.575631  | 2.79 | 2.61E-04 | chr9q22.33           |
|                                                                                           |             | Hs.462257  | 2.75 | 2.39E-05 |                      |
| podoplanin                                                                                | PDPN        | Hs.468675  | 2.75 | 5.00E-07 | chr1p36.21           |
| nuclear factor of kappa light polypeptide gene enhancer in B-cells 2 (p49/p100)           | NFKB2       | Hs.73090   | 2.74 | 1.48E-05 | chr10q24             |
| Meis homeobox 1                                                                           | MEIS1       | Hs.526754  | 2.74 | 1.39E-04 | chr2p14-p13          |

**SM-Table 6: Genes Significantly Upregulated (>2 fold, p<0.05) in HTM Cells Phagocytically Challenged to E. coli Under Oxidative Stress Conditions**

| Gene Title                                                                     | Gene Symbol | UniGene ID | Fold | PValue   | Chromosomal Location |
|--------------------------------------------------------------------------------|-------------|------------|------|----------|----------------------|
|                                                                                |             | Hs.592775  | 2.73 | 2.07E-06 |                      |
| interferon regulatory factor 9                                                 | IRF9        | Hs.1706    | 2.71 | 1.17E-04 | chr14q11.2           |
| tumor necrosis factor (ligand) superfamily, member 10                          | TNFSF10     | Hs.478275  | 2.67 | 1.06E-04 | chr3q26              |
| metallothionein 1X                                                             | MT1X        | Hs.374950  | 2.65 | 7.64E-05 | chr16q13             |
| histone cluster 2, H2aa3 /// histone cluster 2, H2aa4                          | HIST2H2AA3  | Hs.530461  | 2.64 | 4.94E-04 | chr1q21.2            |
| mesenchyme homeobox 1                                                          | MEOX1       | Hs.438     | 2.63 | 1.48E-06 | chr17q21             |
| interleukin 7 receptor                                                         | IL7R        | Hs.635723  | 2.63 | 3.83E-04 | chr5p13              |
| RAB27B, member RAS oncogene family                                             | RAB27B      | Hs.25318   | 2.62 | 1.17E-04 | chr18q21.2           |
| thymidine phosphorylase                                                        | TYMP        | Hs.592212  | 2.62 | 6.62E-06 | chr22q13 22q13.33    |
| signal transducer and activator of transcription 4                             | STAT4       | Hs.80642   | 2.60 | 1.01E-04 | chr2q32.2-q32.3      |
| G0/G1switch 2                                                                  | G0S2        | Hs.432132  | 2.59 | 1.17E-05 | chr1q32.2 1q32.2-q4  |
| CCAAT/enhancer binding protein (C/EBP), delta                                  | CEBPD       | Hs.440829  | 2.59 | 1.48E-04 | chr8p11.2-p11.1      |
| leucine aminopeptidase 3                                                       | LAP3        | Hs.570791  | 2.59 | 3.88E-05 | chr4p15.32           |
| KIAA0146                                                                       | KIAA0146    | Hs.381058  | 2.58 | 1.58E-05 | chr8q11.21           |
| pleckstrin homology-like domain, family A, member 1                            | PHLDA1      | Hs.602085  | 2.58 | 1.04E-05 | chr12q15             |
| metallothionein 1E                                                             | MT1E        | Hs.534330  | 2.57 | 2.53E-04 | chr16q13             |
| solute carrier family 7 (cationic amino acid transporter, y+ system), member 2 | SLC7A2      | Hs.448520  | 2.57 | 1.03E-05 | chr8p22-p21.3        |
|                                                                                |             | Hs.655937  | 2.56 | 2.95E-05 |                      |
| metallothionein 1F                                                             | MT1F        | Hs.513626  | 2.54 | 8.15E-05 | chr16q13             |
| cytochrome P450, family 7, subfamily B, polypeptide 1                          | CYP7B1      | Hs.667720  | 2.54 | 7.32E-04 | chr8q21.3            |
|                                                                                |             | Hs.593316  | 2.53 | 4.36E-05 |                      |
| secreted phosphoprotein 1                                                      | SPP1        | Hs.313     | 2.53 | 1.64E-03 | chr4q21-q25          |
| carbonic anhydrase XII                                                         | CA12        | Hs.210995  | 2.53 | 6.83E-07 | chr15q22             |
| NGFI-A binding protein 1 (EGR1 binding protein 1)                              | NAB1        | Hs.570078  | 2.53 | 3.54E-05 | chr2q32.3-q33        |
| proteasome (prosome, macropain) activator subunit 2 (PA28 beta)                | PSME2       | Hs.434081  | 2.52 | 1.10E-05 | chr14q11.2           |
| hypothetical protein LOC100132999                                              | LOC1001329  | Hs.670106  | 2.52 | 4.71E-05 | chr1q21.1            |
| pigeon homolog (Drosophila)                                                    | PION        | Hs.186649  | 2.51 | 6.88E-05 | chr7q11.23           |
| integrin, alpha 2 (CD49B, alpha 2 subunit of VLA-2 receptor)                   | ITGA2       | Hs.482077  | 2.51 | 6.26E-05 | chr5q23-q31          |
| receptor (chemosensory) transporter protein 4                                  | RTP4        | Hs.43388   | 2.50 | 7.17E-05 | chr3q27.3            |
| R-spondin 3 homolog (Xenopus laevis)                                           | RSPO3       | Hs.135254  | 2.49 | 4.36E-05 | chr6q22.33           |
| similar to WDNM1-like protein                                                  | LOC645638   | Hs.463652  | 2.49 | 3.20E-05 | chr17q23.1           |
| solute carrier family 39 (zinc transporter), member 14                         | SLC39A14    | Hs.491232  | 2.47 | 1.90E-05 | chr8p21.3            |
| F-box protein 32                                                               | FBXO32      | Hs.403933  | 2.46 | 1.90E-04 | chr8q24.13           |

**SM-Table 6: Genes Significantly Upregulated (>2 fold, p<0.05) in HTM Cells Phagocytically Challenged to E. coli Under Oxidative Stress Conditions**

| Gene Title                                                                        | Gene Symbol | UniGene ID | Fold | PValue   | Chromosomal Location |
|-----------------------------------------------------------------------------------|-------------|------------|------|----------|----------------------|
| solute carrier family 15, member 3                                                | SLC15A3     | Hs.237856  | 2.44 | 3.34E-05 | chr11q12.2           |
| Pelota homolog (Drosophila)                                                       | PELO        | Hs.644352  | 2.44 | 9.99E-04 | chr5q11.2            |
| glycoprotein M6B                                                                  | GPM6B       | Hs.495710  | 2.43 | 5.96E-06 | chrXp22.2            |
| leucine rich repeat neuronal 3                                                    | LRRN3       | Hs.3781    | 2.41 | 2.32E-04 | chr7q31.1            |
| sorbin and SH3 domain containing 2                                                | SORBS2      | Hs.655143  | 2.39 | 7.20E-06 | chr4q35.1            |
| synuclein, alpha interacting protein                                              | SNCAIP      | Hs.426463  | 2.39 | 5.72E-06 | chr5q23.1-q23.3      |
| metallothionein 1H                                                                | MT1H        | Hs.438462  | 2.38 | 7.25E-05 | chr16q13             |
| v-rel reticuloendotheliosis viral oncogene homolog B                              | RELB        | Hs.654402  | 2.38 | 1.31E-04 | chr19q13.32          |
| deltex 3-like (Drosophila)                                                        | DTX3L       | Hs.518201  | 2.38 | 7.58E-06 | chr3q21.1            |
| chitinase 3-like 1 (cartilage glycoprotein-39)                                    | CHI3L1      | Hs.382202  | 2.36 | 2.56E-05 | chr1q32.1            |
| v-yes-1 Yamaguchi sarcoma viral related oncogene homolog                          | LYN         | Hs.699154  | 2.35 | 1.52E-04 | chr8q13              |
| chemokine (C-C motif) receptor-like 1                                             | CCRL1       | Hs.310512  | 2.35 | 5.01E-05 | chr3q22              |
| 2'-5'-oligoadenylate synthetase-like                                              | OASL        | Hs.118633  | 2.34 | 2.39E-04 | chr12q24.2           |
| PR domain containing 1, with ZNF domain                                           | PRDM1       | Hs.436023  | 2.34 | 3.60E-04 | chr6q21-q22.1        |
| metallothionein 1G                                                                | MT1G        | Hs.433391  | 2.33 | 5.48E-05 | chr16q13             |
| bradykinin receptor B2                                                            | BDKRB2      | Hs.719484  | 2.33 | 1.26E-05 | chr14q32.1-q32.2     |
| ubiquitin-conjugating enzyme E2L 6                                                | UBE2L6      | Hs.425777  | 2.31 | 9.25E-05 | chr11q12             |
| ELOVL family member 7, elongation of long chain fatty acids (yeast)               | ELOVL7      | Hs.274256  | 2.31 | 6.59E-03 | chr5q12.1            |
| caspase 1, apoptosis-related cysteine peptidase (interleukin 1, beta, convertase) | CASP1       | Hs.2490    | 2.31 | 2.31E-04 | chr11q23             |
| tyrosinase-related protein 1                                                      | TYRP1       | Hs.270279  | 2.30 | 7.91E-04 | chr9p23              |
| chromosome 13 open reading frame 33                                               | C13orf33    | Hs.646647  | 2.30 | 2.94E-05 | chr13q12.3           |
| regulator of calcineurin 1                                                        | RCAN1       | Hs.282326  | 2.29 | 2.49E-05 | chr21q22.1-q22.2 21  |
| eukaryotic translation initiation factor 2-alpha kinase 2                         | EIF2AK2     | Hs.131431  | 2.29 | 5.16E-03 | chr2p22-p21          |
| nuclear receptor subfamily 4, group A, member 2                                   | NR4A2       | Hs.563344  | 2.29 | 1.13E-05 | chr2q22-q23          |
| vascular endothelial growth factor C                                              | VEGFC       | Hs.435215  | 2.28 | 1.65E-06 | chr4q34.1-q34.3      |
| phospholipase A2, group IVC (cytosolic, calcium-independent)                      | PLA2G4C     | Hs.631562  | 2.27 | 7.27E-04 | chr19q13.3           |
| solute carrier family 16, member 3 (monocarboxylic acid transporter 4)            | SLC16A3     | Hs.500761  | 2.27 | 3.03E-05 | chr17q25             |
| acyl-CoA synthetase long-chain family member 5                                    | ACSL5       | Hs.11638   | 2.27 | 3.55E-05 | chr10q25.1-q25.2     |
| adenylate kinase 3-like 1                                                         | AK3L1       | Hs.592601  | 2.26 | 1.50E-05 | chr1p31.3            |
| guanylate binding protein 1, interferon-inducible, 67kDa                          | GBP1        | Hs.62661   | 2.26 | 7.28E-06 | chr1p22.2            |

**SM-Table 6: Genes Significantly Upregulated (>2 fold, p<0.05) in HTM Cells Phagocytically Challenged to E. coli Under Oxidative Stress Conditions**

| Gene Title                                                  | Gene Symbol | UniGene ID | Fold | PValue   | Chromosomal Location |
|-------------------------------------------------------------|-------------|------------|------|----------|----------------------|
| transporter 1, ATP-binding cassette, sub-family B (MDR/TAP) | TAP1        | Hs.352018  | 2.26 | 2.45E-05 | chr6p21.3            |
| phospholipase A2, group IVA (cytosolic, calcium-dependent)  | PLA2G4A     | Hs.497200  | 2.25 | 1.98E-04 | chr1q25              |
| prostaglandin E synthase                                    | PTGES       | Hs.146688  | 2.25 | 9.44E-05 | chr9q34.3            |
| spermatogenesis associated 13                               | SPATA13     | Hs.657121  | 2.23 | 2.29E-05 | chr13q12.12          |
| metallothionein 1 pseudogene 2                              | MT1P2       | Hs.632513  | 2.22 | 1.31E-04 | chr1q43              |
| serglycin                                                   | SRGN        | Hs.1908    | 2.22 | 3.51E-05 | chr10q22.1           |
| ring finger protein 144B                                    | RNF144B     | Hs.148741  | 2.21 | 1.08E-05 | chr6p22.3            |
| ATPase, class I, type 8B, member 4                          | ATP8B4      | Hs.511311  | 2.20 | 1.92E-04 | chr15q21.2           |
| spermidine/spermine N1-acetyltransferase 1                  | SAT1        | Hs.28491   | 2.20 | 5.29E-04 | chrXp22.1            |
|                                                             |             | Hs.546523  | 2.20 | 2.94E-05 |                      |
| metallothionein 2A                                          | MT2A        | Hs.647371  | 2.20 | 4.77E-05 | chr16q13             |
| hyaluronan synthase 2                                       | HAS2        | Hs.159226  | 2.19 | 1.26E-04 | chr8q24.12           |
| poly (ADP-ribose) polymerase family, member 9               | PARP9       | Hs.518200  | 2.19 | 2.94E-05 | chr3q21              |
| phospholipase C-like 1                                      | PLCL1       | Hs.153322  | 2.18 | 1.57E-03 | chr2q33              |
| interleukin 1, beta                                         | IL1B        | Hs.126256  | 2.18 | 9.38E-04 | chr2q14              |
| BCL2/adenovirus E1B 19kDa interacting protein 3             | BNIP3       | Hs.144873  | 2.18 | 2.53E-05 | chr10q26.3           |
| protein kinase (cAMP-dependent, catalytic) inhibitor beta   | PKIB        | Hs.719228  | 2.17 | 4.49E-04 | chr6q22.31           |
| acyl-CoA synthetase long-chain family member 4              | ACSL4       | Hs.268785  | 2.16 | 8.31E-05 | chrXq22.3-q23        |
| butyrophilin, subfamily 3, member A2                        | BTN3A2      | Hs.376046  | 2.16 | 3.68E-05 | chr6p22.1            |
| procollagen-lysine, 2-oxoglutarate 5-dioxygenase 2          | PLOD2       | Hs.477866  | 2.15 | 1.89E-05 | chr3q23-q24          |
| UDP-glucose ceramide glucosyltransferase                    | UGCG        | Hs.304249  | 2.15 | 4.28E-05 | chr9q31              |
| interferon, gamma-inducible protein 30                      | IFI30       | Hs.14623   | 2.14 | 2.29E-05 | chr19p13.1           |
| family with sequence similarity 20, member A                | FAM20A      | Hs.268874  | 2.14 | 3.12E-05 | chr17q24.2           |
| Uncharacterized protein LOC100131897                        | LOC1001318  | Hs.659330  | 2.14 | 1.77E-04 | chr5q35.1            |
|                                                             |             |            | 2.14 | 1.71E-04 |                      |
|                                                             |             |            | 2.13 | 5.55E-05 |                      |
| outer dense fiber of sperm tails 3B                         | ODF3B       | Hs.531314  | 2.13 | 2.16E-03 | chr22q13.33          |
| arylacetamide deacetylase-like 1                            | AADACL1     | Hs.444099  | 2.12 | 5.99E-04 | chr3q26.31           |
| fibroblast growth factor 10                                 | FGF10       | Hs.664499  | 2.12 | 1.91E-03 | chr5p13-p12          |
| toll-like receptor 3                                        | TLR3        | Hs.657724  | 2.12 | 4.67E-05 | chr4q35              |
|                                                             |             | Hs.23349   | 2.12 | 9.53E-03 |                      |
| dystrobrevin, alpha                                         | DTNA        | Hs.643454  | 2.11 | 1.71E-04 | chr18q12             |
| interleukin 15 receptor, alpha                              | IL15RA      | Hs.524117  | 2.11 | 1.05E-04 | chr10p15-p14         |

**SM-Table 6: Genes Significantly Upregulated (>2 fold, p<0.05) in HTM Cells Phagocytically Challenged to E. coli Under Oxidative Stress Conditions**

| Gene Title                                                                                                                         | Gene Symbol  | UniGene ID | Fold | PValue   | Chromosomal Location  |
|------------------------------------------------------------------------------------------------------------------------------------|--------------|------------|------|----------|-----------------------|
| tumor necrosis factor (ligand) superfamily, member 18                                                                              | TNFSF18      | Hs.248197  | 2.11 | 4.77E-05 | chr1q23               |
| similar to hCG38149 /// ovostatin /// ovostatin 2                                                                                  | LOC728715 /  | Hs.568152  | 2.11 | 2.16E-04 | chr12p11.21 /// chr1: |
| oxidized low density lipoprotein (lectin-like) receptor 1                                                                          | OLR1         | Hs.412484  | 2.10 | 2.15E-03 | chr12p13.2-p12.3      |
| chromosome 7 open reading frame 58                                                                                                 | C7orf58      | Hs.189652  | 2.10 | 1.10E-05 | chr7q31.31            |
| SP100 nuclear antigen                                                                                                              | SP100        | Hs.369056  | 2.10 | 4.13E-05 | chr2q37.1             |
|                                                                                                                                    |              | Hs.201600  | 2.09 | 3.76E-06 |                       |
| methylenetetrahydrofolate dehydrogenase (NADP+ dependent) 2-like                                                                   | MTHFD2L      | Hs.479954  | 2.09 | 1.06E-05 | chr4q13.3             |
|                                                                                                                                    |              | Hs.28792   | 2.09 | 9.96E-07 |                       |
| endoplasmic reticulum aminopeptidase 2                                                                                             | ERAP2        | Hs.482910  | 2.07 | 3.94E-05 | chr5q15               |
| FYVE, RhoGEF and PH domain containing 4                                                                                            | FGD4         | Hs.117835  | 2.07 | 1.31E-04 | chr12p11.21           |
| tripartite motif-containing 69                                                                                                     | TRIM69       | Hs.489254  | 2.06 | 1.10E-04 | chr15q21.1            |
| glycerol kinase                                                                                                                    | GK           | Hs.1466    | 2.06 | 9.08E-04 | chrXp21.3             |
| interferon stimulated exonuclease gene 20kDa                                                                                       | ISG20        | Hs.459265  | 2.06 | 1.74E-05 | chr15q26              |
| transporter 2, ATP-binding cassette, sub-family B (MDR/ TAP)                                                                       | TAP2         | Hs.502     | 2.06 | 1.03E-04 | chr6p21.3             |
|                                                                                                                                    |              | Hs.591248  | 2.06 | 6.24E-03 |                       |
| solute carrier family 22, member 23                                                                                                | SLC22A23     | Hs.713588  | 2.06 | 4.01E-05 | chr6p25.2             |
|                                                                                                                                    |              | Hs.439682  | 2.05 | 2.72E-04 |                       |
| tripartite motif-containing 25                                                                                                     | TRIM25       | Hs.528952  | 2.05 | 7.55E-05 | chr17q23.2            |
| transmembrane protein 132B                                                                                                         | TMEM132B     | Hs.524838  | 2.05 | 6.66E-03 | chr12q24.31-q24.32    |
| colony stimulating factor 1 (macrophage)                                                                                           | CSF1         | Hs.591402  | 2.04 | 2.00E-05 | chr1p21-p13           |
| dual specificity phosphatase 6                                                                                                     | DUSP6        | Hs.298654  | 2.04 | 6.41E-05 | chr12q22-q23          |
| TNFAIP3 interacting protein 1                                                                                                      | TNIP1        | Hs.355141  | 2.04 | 1.08E-04 | chr5q32-q33.1         |
| v-myb myeloblastosis viral oncogene homolog (avian)-like 1                                                                         | MYBL1        | Hs.445898  | 2.04 | 1.01E-04 | chr8q22               |
| mannosidase, alpha, class 1A, member 1                                                                                             | MAN1A1       | Hs.102788  | 2.04 | 1.93E-04 | chr6q22               |
| caspase recruitment domain family, member 16 /// caspase 1, apoptosis-related cysteine peptidase (interleukin 1, beta, convertase) | CARD16 /// C | Hs.348365  | 2.03 | 1.75E-04 | chr11q23              |
|                                                                                                                                    |              |            | 2.03 | 1.34E-04 |                       |
| gamma-aminobutyric acid (GABA) B receptor, 1 /// ubiquitin D                                                                       | GABBR1 /// U | Hs.719331  | 2.03 | 1.47E-03 | chr6p21.3 /// chr6p2  |
| interleukin 18 binding protein                                                                                                     | IL18BP       | Hs.591967  | 2.03 | 2.34E-06 | chr11q13              |
| UDP-GlcNAc:betaGal beta-1,3-N-acetylglucosaminyltransferase 5                                                                      | B3GNT5       | Hs.718506  | 2.02 | 2.23E-02 | chr3q28               |



**SM-Table 6: Genes Significantly Upregulated (>2 fold, p<0.05) in HTM Cells Phagocytically Challenged to E. coli Under Oxidative Stress Conditions**

| Gene Title                                                               | Gene Symbol  | UniGene ID | Fold | PValue   | Chromosomal Location |
|--------------------------------------------------------------------------|--------------|------------|------|----------|----------------------|
| junctional adhesion molecule 2                                           | JAM2         | Hs.517227  | 2.02 | 1.48E-04 | chr21q21.2           |
|                                                                          |              |            | 2.02 | 6.29E-03 |                      |
| chromosome 6 open reading frame 176                                      | C6orf176     | Hs.31917   | 2.01 | 3.58E-04 | chr6q27              |
| zona pellucida glycoprotein 4                                            | ZP4          | Hs.136241  | 2.01 | 4.66E-05 | chr1q43              |
| tumor necrosis factor receptor superfamily, member 11b                   | TNFRSF11B    | Hs.81791   | 2.01 | 6.71E-06 | chr8q24              |
| histone cluster 2, H2be                                                  | HIST2H2BE    | Hs.2178    | 2.01 | 1.27E-04 | chr1q21-q23          |
|                                                                          |              | Hs.634153  | 2.01 | 2.66E-04 |                      |
| basic leucine zipper transcription factor, ATF-like 2                    | BATF2        | Hs.124840  | 2.00 | 4.44E-03 | chr11q13.1           |
| dipeptidyl-peptidase 4                                                   | DPP4         | Hs.368912  | 2.00 | 3.21E-05 | chr2q24.3            |
| chromosome 11 open reading frame 17 /// NUAK family, SNF1-like kinase, 2 | C11orf17 /// | Hs.131180  | 2.00 | 1.98E-04 | chr11p15.3 /// chr1q |
