# Supplementary material for: Up-Regulated Expression of Extracellular Matrix Remodeling Genes in Phagocytically Challenged Trabecular Meshwork Cells
Source: PubMed Central journal article supplement (PMC3329506; doi:10.1371/journal.pone.0034792), 2012-04-18
Supplement: pone.0034792.s008.pdf [file pone.0034792.s008.pdf]

**SM-Table 7: Genes Significantly Downregulated (>2 fold, p<0.05) in HTM Cells Phagocytically Challenged to E. coli Under Oxidative Stress Conditions**

| Gene Title                                                                                | Gene Symbol | UniGene ID | Fold | PValue   | Chromosomal Location |
|-------------------------------------------------------------------------------------------|-------------|------------|------|----------|----------------------|
| tumor necrosis factor receptor superfamily, member 10d, decoy with truncated death domain | TNFRSF10D   | Hs.213467  | 4.11 | 2.13E-06 | chr8p21              |
| endothelin 3                                                                              | EDN3        | Hs.1408    | 4.04 | 2.59E-05 | chr20q13.2-q13.3     |
| ribosomal protein L27a                                                                    | RPL27A      | Hs.523463  | 3.08 | 2.97E-04 | chr11p15             |
|                                                                                           |             | Hs.26766   | 2.76 | 6.94E-05 |                      |
| ceroid-lipofuscinosis, neuronal 8 (epilepsy, progressive with mental retardation)         | CLN8        | Hs.127675  | 2.68 | 1.29E-05 | chr8p23              |
| sclerostin domain containing 1                                                            | SOSTDC1     | Hs.648106  | 2.65 | 3.88E-05 | chr7p21.1            |
| AF4/FMR2 family, member 3                                                                 | AFF3        | Hs.444414  | 2.64 | 1.05E-04 | chr2q11.2-q12        |
| C1q and tumor necrosis factor related protein 7                                           | C1QTNF7     | Hs.153714  | 2.57 | 6.13E-05 | chr4p16-p15          |
| Fibroblast growth factor 18                                                               | FGF18       | Hs.87191   | 2.57 | 2.61E-06 | chr5q34              |
| nanos homolog 1 (Drosophila)                                                              | NANOS1      | Hs.591918  | 2.52 | 2.21E-04 | chr10q26.11          |
| aldehyde dehydrogenase 1 family, member A1                                                | ALDH1A1     | Hs.76392   | 2.47 | 9.83E-04 | chr9q21.13           |
| aquaporin 1 (Colton blood group)                                                          | AQP1        | Hs.76152   | 2.46 | 1.45E-03 | chr7p14              |
|                                                                                           |             | Hs.554052  | 2.41 | 1.39E-02 |                      |
| DIRAS family, GTP-binding RAS-like 2                                                      | DIRAS2      | Hs.165636  | 2.31 | 1.37E-04 | chr9q22.2            |
| 5'-nucleotidase domain containing 2                                                       | NT5DC2      | Hs.84753   | 2.27 | 5.56E-05 | chr3p21.1            |
| interleukin 17 receptor D                                                                 | IL17RD      | Hs.150725  | 2.27 | 9.36E-04 | chr3p14.3            |
| cyclin-dependent kinase inhibitor 1C (p57, Kip2)                                          | CDKN1C      | Hs.106070  | 2.23 | 5.05E-06 | chr11p15.5           |
| odd-skipped related 2 (Drosophila)                                                        | OSR2        | Hs.253247  | 2.22 | 8.40E-06 | chr8q22.2            |
| nuclear transcription factor Y, alpha                                                     | NFYA        | Hs.10441   | 2.19 | 6.62E-04 | chr6p21.3            |
| EPH receptor A3                                                                           | EPHA3       | Hs.123642  | 2.18 | 7.27E-06 | chr3p11.2            |
| potassium intermediate/small conductance calcium-activated channel, subfamily N, member 2 | KCNN2       | Hs.98280   | 2.12 | 5.53E-04 | chr5q22.3            |
| H19, imprinted maternally expressed transcript (non-protein coding)                       | H19         | Hs.533566  | 2.08 | 2.21E-06 | chr11p15.5           |
| melanocortin 2 receptor accessory protein 2                                               | MRAP2       | Hs.370055  | 2.07 | 2.44E-04 | chr6q14.3            |
| family with sequence similarity 172, member A                                             | FAM172A     | Hs.600086  | 2.06 | 3.20E-05 | chr5q15              |
| small nuclear ribonucleoprotein polypeptide N                                             | SNRPN       | Hs.592473  | 2.05 | 2.34E-02 | chr15q11.2           |
| secretogranin II (chromogranin C)                                                         | SCG2        | Hs.516726  | 2.05 | 5.20E-06 | chr2q35-q36          |
| G protein-coupled receptor 37 (endothelin receptor type B-like)                           | GPR37       | Hs.406094  | 2.03 | 1.34E-04 | chr7q31              |
| carbohydrate (N-acetylglucosamine 6-O) sulfotransferase 6                                 | CHST6       | Hs.655622  | 2.02 | 2.35E-04 | chr16q22             |
|                                                                                           |             | Hs.534221  | 2.01 | 1.48E-04 |                      |
| hydroxysteroid (17-beta) dehydrogenase 6 homolog (mouse)                                  | HSD17B6     | Hs.524513  | 2.01 | 1.58E-03 | chr12q13             |
