# Supplementary material for: Up-Regulated Expression of Extracellular Matrix Remodeling Genes in Phagocytically Challenged Trabecular Meshwork Cells
Source: PubMed Central journal article supplement (PMC3329506; doi:10.1371/journal.pone.0034792), 2012-04-18
Supplement: pone.0034792.s009.pdf [file pone.0034792.s009.pdf]

**SM-Table 8: Genes Significantly Upregulated (>1.5 fold, p<0.05) in HTM Cells Phagocytically Challenged to Pigment Under Oxidative Stress Conditions**

| Gene Title                                                                              | Gene Symbol | UniGene ID | Fold | PValue  | Chromosomal Location |
|-----------------------------------------------------------------------------------------|-------------|------------|------|---------|----------------------|
| tumor necrosis factor (ligand) superfamily, member 11                                   | TNFSF11     | Hs.333791  | 2.12 | 2.9E-05 | chr13q14             |
| matrix metalloproteinase 1 (interstitial collagenase)                                   | MMP1        | Hs.83169   | 1.79 | 1.8E-05 | chr11q22.3           |
| matrix metalloproteinase 3 (stromelysin 1, progelatinase)                               | MMP3        | Hs.375129  | 1.79 | 1.8E-05 | chr11q22.3           |
| annexin A10                                                                             | ANXA10      | Hs.188401  | 1.63 | 1.7E-02 | chr4q33              |
| family with sequence similarity 40, member B                                            | FAM40B      | Hs.489988  | 1.63 | 1.2E-02 | chr7q32.1            |
| discs, large (Drosophila) homolog-associated protein 5                                  | DLGAP5      | Hs.77695   | 1.61 | 9.9E-05 | chr14q22.3           |
| RAB27B, member RAS oncogene family                                                      | RAB27B      | Hs.25318   | 1.61 | 2.5E-04 | chr18q21.2           |
| centromere protein F, 350/400ka (mitosin)                                               | CENPF       | Hs.497741  | 1.61 | 1.1E-03 | chr1q32-q41          |
| deiodinase, iodothyronine, type II                                                      | DIO2        | Hs.202354  | 1.59 | 6.8E-05 | chr14q24.2-q24.3     |
| aquaporin 3 (Gill blood group)                                                          | AQP3        | Hs.234642  | 1.58 | 1.1E-03 | chr9p13              |
| cyclin B1                                                                               | CCNB1       | Hs.23960   | 1.56 | 6.8E-05 | chr5q12              |
| heme oxygenase (decycling) 1                                                            | HMOX1       | Hs.517581  | 1.56 | 2.7E-04 | chr22q12 22q13.1     |
| kynureninase (L-kynurenine hydrolase)                                                   | KYNU        | Hs.470126  | 1.56 | 6.8E-05 | chr2q22.2            |
| UDP-N-acetyl-alpha-D-galactosamine:polypeptide N-acetylgalactosaminyltransferase-like 2 | GALNTL2     | Hs.411308  | 1.54 | 2.1E-03 | chr3p24.3            |
| interleukin 13 receptor, alpha 2                                                        | IL13RA2     | Hs.336046  | 1.53 | 2.7E-03 | chrXq13.1-q28        |
| prostaglandin-endoperoxide synthase 1 (prostaglandin G/H synthase and cyclooxygenase)   | PTGS1       | Hs.201978  | 1.53 | 2.8E-04 | chr9q32-q33.3        |
| cell division cycle 25 homolog C (S. pombe)                                             | CDC25C      | Hs.656     | 1.49 | 8.5E-04 | chr5q31              |
| hect domain and RLD 5                                                                   | HERC5       | Hs.26663   | 1.49 | 2.2E-05 | chr4q22.1            |
| aquaporin 11                                                                            | AQP11       | Hs.503345  | 1.48 | 5.9E-04 | chr11q14.1           |
| centromere protein A                                                                    | CENPA       | Hs.1594    | 1.48 | 2.5E-04 | chr2p24-p21          |
| CD109 molecule                                                                          | CD109       | Hs.399891  | 1.48 | 4.9E-02 | chr6q13              |
| leucine rich repeat transmembrane neuronal 2                                            | LRRTM2      |            | 1.46 | 4.8E-02 | chr5q31.2            |
| laminin, gamma 2                                                                        | LAMC2       | Hs.591484  | 1.45 | 1.1E-03 | chr1q25-q31          |
