# Supplementary material for: Up-Regulated Expression of Extracellular Matrix Remodeling Genes in Phagocytically Challenged Trabecular Meshwork Cells
Source: PubMed Central journal article supplement (PMC3329506; doi:10.1371/journal.pone.0034792), 2012-04-18
Supplement: pone.0034792.s010.pdf [file pone.0034792.s010.pdf]

**SM-Table 9: Genes Significantly Downregulated (>1.5 fold, p<0.05) in HTM Cells Phagocytically Challenged to Pigment Under Oxidative Stress Conditions**

| Gene Title                                                                                               | Gene Symbol | UniGene ID | Fold | PValue  | Chromosomal Location |
|----------------------------------------------------------------------------------------------------------|-------------|------------|------|---------|----------------------|
| oxytocin receptor                                                                                        | OXTR        | Hs.2820    | 1.75 | 5.9E-04 | chr3p25              |
| RAS guanyl releasing protein 1 (calcium and DAG-regulated)                                               | RASGRP1     | Hs.591127  | 1.65 | 6.8E-05 | chr15q14             |
| somatostatin receptor 1                                                                                  | SSTR1       | Hs.248160  | 1.62 | 8.5E-03 | chr14q13             |
| potassium intermediate/small conductance calcium-activated channel, subfamily N, member 2                | KCNN2       | Hs.98280   | 1.61 | 1.0E-03 | chr5q22.3            |
| family with sequence similarity 35, member A                                                             | FAM35A      | Hs.500419  | 1.58 | 1.7E-02 | chr10q23.2           |
|                                                                                                          |             | Hs.411391  | 1.57 | 4.8E-03 |                      |
| mannose-binding lectin (protein A) 1, pseudogene 1                                                       | MBL1P1      | Hs.102310  | 1.53 | 1.7E-02 | chr10q22.2-q22.3     |
| actin, alpha 2, smooth muscle, aorta                                                                     | ACTA2       | Hs.500483  | 1.53 | 4.7E-04 | chr10q23.3           |
| chromosome 8 open reading frame 34                                                                       | C8orf34     | Hs.491941  | 1.52 | 1.5E-03 | chr8q13              |
| Fms-related tyrosine kinase 1 (vascular endothelial growth factor/vascular permeability factor receptor) | FLT1        | Hs.594454  | 1.52 | 1.3E-02 |                      |
| leucine zipper, putative tumor suppressor 1                                                              | LZTS1       | Hs.521432  | 1.49 | 4.8E-02 | chr8p22              |
| keratin associated protein 1-5                                                                           | KRTAP1-5    | Hs.534499  | 1.46 | 3.4E-04 | chr17q12-q21         |
